# Supplementary material
Source: Royal Society of Chemistry journal article supplement (doi:10.1039/d6cc02787c)
Supplement: d6cc02787c1.pdf [file d6cc02787c1.pdf]

*Electronic Supporting Information*  
*for*  
**Oxidation-State-Controlled Switching Between AIE and ACQ in Pyrene**  
**Luminophores**

Vignesh Rajendran<sup>a</sup>, K. R. Justin Thomas<sup>a\*</sup>

<sup>a</sup>Organic Material Laboratory, Department of Chemistry, Indian Institute of Technology Roorkee,  
Roorkee, 247667, India.

\* Corresponding author: krjt@cy.iitr.ac.in

**Table of contents**

|                 |                                                                                                                                           |              |
|-----------------|-------------------------------------------------------------------------------------------------------------------------------------------|--------------|
|                 | <b>Instrumentation</b>                                                                                                                    | <b>S3</b>    |
|                 | <b>Experimental section</b>                                                                                                               | <b>S4</b>    |
|                 | Density Functional Theory (DFT) calculations                                                                                              | <b>S4</b>    |
|                 | Crystallization methods                                                                                                                   | <b>S5</b>    |
|                 | <b>Synthesis and experimental procedures</b>                                                                                              | <b>S6-S8</b> |
|                 | <b>Photophysical studies</b>                                                                                                              | <b>S9</b>    |
| <b>Fig. S1</b>  | (a) Emission spectrum of all dyes in (a) thin film (b) solid.                                                                             | <b>S9</b>    |
| <b>Table S1</b> | Summary of photophysical properties                                                                                                       | <b>S9</b>    |
| <b>Fig. S2</b>  | Lifetime decay of all dyes in solution, thin film and solid.                                                                              | <b>S10</b>   |
| <b>Table S2</b> | Lifetime decay of all dyes in solution, thin film and solid.                                                                              | <b>S10</b>   |
| <b>Fig. S3</b>  | Decomposed Hirshfeld surface plots of <b>DS blue</b> showing contributions from (a) C···C, (b) C···H, and (c) S···H interactions.         | <b>S11</b>   |
| <b>Fig. S4</b>  | Decomposed Hirshfeld surface plots of <b>DS green</b> showing contributions from (a) C···C, (b) C···H, and (c) S···H interactions         | <b>S11</b>   |
| <b>Fig. S5</b>  | Decomposed Hirshfeld surface plots of <b>DS (1)</b> showing contributions from (a) C···C, (b) C···H, and (c) S···H interactions           | <b>S11</b>   |
| <b>Fig. S6</b>  | Decomposed Hirshfeld surface plots of <b>DSO</b> showing contributions from (a) C···C, (b) C···H, (c) S···H, and (d) O···H interactions.  | <b>S12</b>   |
| <b>Fig. S7</b>  | Decomposed Hirshfeld surface plots of <b>DSO<sub>2</sub></b> showing contributions from (a) C···C, (b) C···H, and (c) O···H interactions. | <b>S12</b>   |
| <b>Fig. S8</b>  | (a) Absorption, (b) emission spectra of <b>DS</b> recorded in different solvents.                                                         | <b>S12</b>   |
| <b>Fig. S9</b>  | (a) Absorption, (b) emission spectra of <b>DSO</b> recorded in different solvents.                                                        | <b>S13</b>   |
| <b>Fig. S10</b> | (a) Absorption, (b) emission spectra of <b>DSO<sub>2</sub></b> recorded in different solvents                                             | <b>S13</b>   |
| <b>Table S3</b> | Solvatochromic data of <b>DS</b> in various solvents.                                                                                     | <b>S13</b>   |
| <b>Table S4</b> | Solvatochromic data of <b>DSO</b> in various solvents.                                                                                    | <b>S13</b>   |
| <b>Table S5</b> | Solvatochromic data of <b>DSO<sub>2</sub></b> in various solvents.                                                                        | <b>S14</b>   |

|                  |                                                                                                                                        |            |
|------------------|----------------------------------------------------------------------------------------------------------------------------------------|------------|
| <b>Table S6</b>  | Solvatochromic properties of all dyes.                                                                                                 | <b>S14</b> |
| <b>Fig. S11</b>  | AIE study of (a) <b>DS</b> and (b) <b>DSO<sub>2</sub></b> in THF/H <sub>2</sub> O mixture.                                             | <b>S14</b> |
| <b>Fig. S12</b>  | (a) $I/I_0$ plot of <b>DS</b> and <b>DSO<sub>2</sub></b> (b) Lifetime decay of (b) <b>DS</b> (c) <b>DSO</b> in aggregated fractions.   | <b>S15</b> |
| <b>Table S7</b>  | Selected bond lengths and angles observed in <b>DS</b> , <b>DSO</b> and <b>DSO<sub>2</sub></b>                                         | <b>S15</b> |
| <b>Fig. S13</b>  | Noncovalent interactions analysis of (a) <b>DS<sub>b1</sub></b> , (b) <b>DS<sub>b1</sub></b> , (c) <b>DS<sub>g</sub></b> crystals      | <b>S16</b> |
| <b>Fig. S14</b>  | Emission spectrum of mechanochromic behaviour of <b>DS<sub>g</sub></b> crystal ( $\lambda_{ex} = 370$ nm).                             | <b>S16</b> |
| <b>Fig. S15</b>  | Lifetime decay of all the (a) <b>DS<sub>b1</sub></b> , <b>DS<sub>b1</sub></b> , <b>DS<sub>g</sub></b> (b) <b>DS<sub>g</sub> ground</b> | <b>S17</b> |
| <b>Table S8</b>  | Kinetic parameter of (a) <b>DS<sub>b1</sub></b> , (b) <b>DS<sub>b1</sub></b> , (c) <b>DS<sub>g</sub></b> crystals                      | <b>S17</b> |
| <b>Fig. S16</b>  | Noncovalent interactions analysis of (a) <b>DSO</b> (b) <b>DSO<sub>2</sub></b>                                                         | <b>S17</b> |
| <b>Fig. S17</b>  | Frontier molecular orbital energy level of all dyes.                                                                                   | <b>S18</b> |
| <b>Fig. S18</b>  | FMOs HOMO/HOMO-1 and LUMO/LUMO+1 electronic distributions and difference density plot for S <sub>1</sub> state of all dyes.            | <b>S18</b> |
| <b>Fig. S19</b>  | (a) Cyclic voltammetry and (b) DPV of all dyes recorded in DCM                                                                         | <b>S19</b> |
| <b>Fig. S20</b>  | Thermal stability of all dyes                                                                                                          | <b>S19</b> |
| <b>Table S9</b>  | Thermal and electrochemical properties of all dyes                                                                                     | <b>S19</b> |
| <b>Table S10</b> | Kinetic parameter of all dyes in various water fractions                                                                               | <b>S20</b> |
| <b>Fig. S21</b>  | SEM images of all dyes                                                                                                                 | <b>S20</b> |
| <b>Fig. S22</b>  | Concentration dependent emission of (a) <b>DS</b> , (b) <b>DSO</b> , and (c) <b>DSO<sub>2</sub></b>                                    | <b>S21</b> |
| <b>Table S11</b> | Crystal data and structure refinement for <b>DS<sub>b1</sub></b>                                                                       | <b>S21</b> |
| <b>Table S12</b> | Crystal data and structure refinement for <b>DS<sub>b2</sub></b>                                                                       | <b>S22</b> |
| <b>Table S13</b> | Crystal data and structure refinement for <b>DS<sub>g</sub></b>                                                                        | <b>S22</b> |
| <b>Table S14</b> | Crystal data and structure refinement for <b>DSO</b>                                                                                   | <b>S23</b> |
| <b>Table S15</b> | Crystal data and structure refinement for <b>DSO<sub>2</sub></b>                                                                       | <b>S24</b> |
| <b>Fig. S23</b>  | <sup>1</sup> H NMR (500 MHz, CDCl <sub>3</sub> <i>D</i> ) of (2)                                                                       | <b>S25</b> |
| <b>Fig. S24</b>  | <sup>1</sup> H NMR (500 MHz, CDCl <sub>3</sub> ) of <b>DS</b>                                                                          | <b>S25</b> |
| <b>Fig. S25</b>  | <sup>13</sup> C NMR (126 MHz, CDCl <sub>3</sub> ) of <b>DS</b>                                                                         | <b>S26</b> |
| <b>Fig. S26</b>  | <sup>1</sup> H NMR (500 MHz, CDCl <sub>3</sub> ) of <b>DSO</b>                                                                         | <b>S26</b> |
| <b>Fig. S27</b>  | <sup>13</sup> C NMR (126 MHz, CDCl <sub>3</sub> ) of <b>DSO</b>                                                                        | <b>S27</b> |
| <b>Fig. S28</b>  | <sup>1</sup> H NMR (500 MHz, CDCl <sub>3</sub> ) of <b>DSO<sub>2</sub></b>                                                             | <b>S27</b> |
| <b>Fig. S29</b>  | <sup>13</sup> C NMR (126 MHz, CDCl <sub>3</sub> ) of <b>DSO<sub>2</sub></b>                                                            | <b>S28</b> |
|                  | <b>References</b>                                                                                                                      | <b>S28</b> |

## Instrumentation

The  $^1\text{H}$  and  $^{13}\text{C}$  NMR spectra were recorded in a JEOL 500 MHz spectrometer instrument at 298 K with  $\text{CDCl}_3$  as a deuterated solvent and TMS as an internal standard. Chemical shifts ( $\delta$ ) are reported in ppm relative to residual solvent signals  $\text{CDCl}_3$ : 7.26 ppm for  $^1\text{H}$  NMR and 77.10 ppm for  $^{13}\text{C}$  NMR. HRMS spectra were acquired on Agilent Mass Hunter Qualitative Analysis 10 Software. UV-Vis absorption spectra for all the final dyes were recorded on a Cary 100 UV-vis spectrophotometer. Fluorescence emission spectra have been recorded in the Horiba Scientific Fluoromax 4C spectrophotometer. The dyes' absolute photoluminescence quantum yield (PLQY) was determined by the calibrated integrating sphere method in the Edinburgh spectrofluorometer. The fluorescence lifetime measurements of liquid, solid, and thin film samples, including fitting, were acquired by the FLS 1000 Edinburgh instrument. FE-SEM Carl Zeiss Ultra Plus was acquired to study the morphology of aggregated samples. All data were collected from a single crystal at 103 K on a Bruker D8 QUEST FIXED CHI diffractometer with a microfocus sealed tube using a multilayer mirror as monochromator and a Bruker PHOTON III CPAD detector. The diffractometer was equipped with an Oxford Cryostream 1000 low temperature device and used  $\text{Mo } K_\alpha$  radiation ( $\lambda = 0.71073 \text{ \AA}$ ). All data were integrated with SAINT V8.42, yielding 36530 reflections of which 4943 were independent (average redundancy 7.39) and 74.0% were greater than  $2\sigma(F^2)$ . A Multi-Scan absorption correction using SADABS 2016/2 was applied. The structure was solved by Intrinsic Phasing methods with SHELXT 2018/2 and refined by full-matrix least-squares methods against  $F^2$  using SHELXL-2019/2. All non-hydrogen atoms were refined with anisotropic displacement parameters. All hydrogen atoms were refined isotropic on calculated positions using a riding model with their  $U_{\text{iso}}$  values constrained to 1.5 times the  $U_{\text{eq}}$  of their pivot atoms for terminal  $\text{sp}^3$  carbon atoms and 1.2 times for all other carbon atoms. An electrochemical analyzer with a three-electrode set up (glassy carbon as working electrode,

non- aqueous Ag/AgNO<sub>3</sub> as reference electrode, and platinum auxiliary electrode) was used to record cyclic voltammetry (CV) and differential pulse voltammetry (DPV) with ferrocene as internal standard and tetrabutylammonium perchlorate as supporting electrolyte using BASi Epsilon electrochemical analyzer. The thermal stability of dyes was observed by thermogravimetric analysis (TGA) using a Perkin–Elmer Pyris diamond analyzer instrument with a heating rate of 10°C/min and by maintaining a nitrogen atmosphere.

## Materials

All the required chemicals were purchased from the available commercial sources and used without further purification. Pyrene, *p*-toluene thiol, *m*CPBA, Cs<sub>2</sub>CO<sub>3</sub>, all other reagents and solvents were purchased and utilized without further purification from Sigma Aldrich, TCI, and SRL chemicals. All the solvents were distilled using the appropriate distillation set up for further studies. Precoated alumina plates from Merck grade were used for thin layer chromatography (TLC) analysis. All the compounds were purified using column chromatography over silica gel having mesh sizes ranging from 200-400.

## Experimental section

### Density Functional Theoretical Calculations

All the theoretical calculations were performed using ORCA 6.0.1 software<sup>1</sup> at the B3LYP/def2-svp level. The geometries of the lowest excited singlet (S<sub>1</sub>) and triplet (T<sub>1</sub>) states were optimized by TD-DFT. The global minima of the optimized structures were confirmed by frequency calculation on the optimized structures which showed no negative frequencies. TD-DFT calculations at the B3LYP/def2-tzvp level on the optimized structures were performed to estimate the excitation energies, singlet-triplet energy gap and other relevant parameters. Natural transition orbitals (NTO) and the charge transfer indices were calculated using a Multiwfn program.<sup>2</sup>

## Crystallization procedure

All the crystal was obtained by solvent vapor diffusion technique. For this, **DS<sub>b1</sub>**, **DS<sub>b2</sub>** and **DS<sub>g</sub>** crystallized using different solvent mixtures like DCM/Hexane, THF/Hexane and DCM/MeOH, whereas **DSO** and **DSO<sub>2</sub>** crystal obtained by DCM/Hexane layering at room temperature.

## Excited state dipole moment and Lippert Mataga plot calculations

In this equation,  $\mu_e - \mu_g$  the dipole moments in the ground and excited states, respectively,  $h$  is Planck's constant,  $c$  is speed of light,  $a$  is radius of molecules and  $\Delta\nu$  is Stokes shift, which is calculated from the difference between absorption and emission maxima in the wave number scale ( $\text{cm}^{-1}$ ). The Lippert-Mataga plot for **DS**, **DSO**, and **DSO<sub>2</sub>** dyes having Stokes shift ( $\Delta\nu$   $\text{cm}^{-1}$ ) plotted against orientation polarizability ( $\epsilon$ ) and Lippert-Mataga solvent polarity parameters ( $n$ ) and  $\Delta f$  ( $\epsilon, n$ ) has been calculated from Eq. (1). The  $\Delta f$  orientation polarizability is expressed in Eq. (2) as

$$\Delta\nu = \nu_{abs} - \nu_{emi} = \frac{2(\mu_e - \mu_g)^2}{hca^3} \Delta f + Cont \quad (1)$$

$$\Delta f(\epsilon, n) = \left( \frac{(\epsilon - 1)}{(2\epsilon + 1)} - \frac{(n^2 - 1)}{(2n^2 + 1)} \right) \quad (2)$$

Where  $\Delta f$  is orientation polarizability,  $\epsilon$  and  $n$  are solvent dielectric constant and refractive index respectively and  $\Delta\nu$  for Stokes shift.<sup>3</sup>

## Synthesis procedures

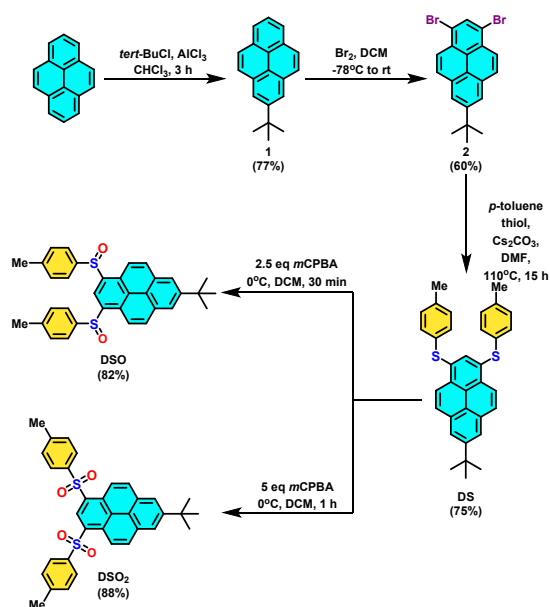

**Scheme 1** Synthetic route of all three dyes.

### Synthesis of precursors: 1

1 was synthesized by following reported protocol.<sup>4</sup> In a 250 mL RB flask, compound pyrene (25 g, 123 mmol) was dissolved in dry DCM (100 mL) and cooled at 0 °C. Afterward, AlCl<sub>3</sub> (16.5 g, 123 mmol, 1 equiv.) was added in one portion at the same temperature. Finally, dropwise *t*-BuCl (13.4 mL, 123 mmol, 1 eq) was added to the mixture under N<sub>2</sub> atm. Then, the brown mixture was shifted to room temperature and allowed to stir for 3 hours. After completing reaction hours, excess of AlCl<sub>3</sub> was quenched by adding sat. NaHCO<sub>3</sub> solution. Then, the organic phase was extracted with DCM, dried over anhydrous sodium sulfate, and concentrated by rotary evaporation. Finally, the crude product was purified by column chromatography (eluant: 100% Hexane) and obtained as colourless solid having a 77% yield. <sup>1</sup>H NMR (500 MHz, CDCl<sub>3</sub>) δ 8.44 (s, 1H), 8.34 (d, *J* = 9.2 Hz, 2H), 8.29 (s, 2H), 8.16 (d, *J* = 9.2 Hz, 2H), 1.60 (s, 11H).

### Synthesis of precursors: 2

**2** was synthesized by following reported protocol.<sup>5</sup> To a flask tert-butyl pyrene (5 g, 19.35 mmol, 1 eq) in DCM (100 mL) was maintained at -78 °C. Afterward liq. Br<sub>2</sub> (1.9 mL, 38.97 mmol, 2 eq) in DCM (40 mL) was added dropwise to the mixture at same temperature. Then allowed to stir for 15 hours at room temperature. Next reaction mixture was quenched by sat. Na<sub>2</sub>S<sub>2</sub>O<sub>3</sub> solution (10 mL). The resultant precipitate was collected under vacuum and washed with methanol (40 mL). Finally crude product was washed with hexane (20 mL) which yield the white solid (4.83 g, 60% yield) and used without further purification. <sup>1</sup>H NMR (500 MHz, CDCl<sub>3</sub>) δ 8.44 (s, 1H), 8.34 (d, J = 9.2 Hz, 2H), 8.29 (s, 2H), 8.16 (d, J = 9.2 Hz, 2H), 1.60 (s, 9H).

### Synthesis of DS

In RB flask equipped with condenser (**1**) (1 g, 2.4 mmol, 1 eq), *p*-toluenethiol (655 mg, 5.20 mmol, 2.2 eq) and Cs<sub>2</sub>CO<sub>3</sub> (1.7 g, 5.20 mmol, 2.2 eq) was dissolved in 15 mL of DMF followed by N<sub>2</sub> purging over 5 min. Then heated at 110 °C for 15 hours at N<sub>2</sub> atm. After cooling to room temperature mixture was poured into cold water and the precipitate was filtered and dried over vacuum. Finally crude product was purified by column chromatography using 5% CHCl<sub>3</sub>/Hexane as eluent got pale green solid (907 mg, 75% yield). <sup>1</sup>H NMR (500 MHz, CDCl<sub>3</sub>) δ 8.56 (d, J = 9.2 Hz, 2H), 8.24 (s, 2H), 8.10 (d, J = 9.2 Hz, 2H), 8.01 (s, 1H), 7.12 – 7.10 (m, 4H), 7.02 – 7.00 (m, 4H), 2.30 (s, 6H), 1.58 (s, 9H) ppm. <sup>13</sup>C {<sup>1</sup>H} NMR (125 MHz, CDCl<sub>3</sub>) δ 149.93, 136.70, 134.90, 132.67, 131.10, 130.18, 128.84, 125.95, 124.50, 123.33, 122.66, 35.34, 31.95 ppm. IR (KBr) cm<sup>-1</sup>: 3040, 2946, 2916, 2859, 1586, 798, 713. HRMS: Calculated mass C<sub>34</sub>H<sub>31</sub>S<sub>2</sub> [(M+H)<sup>+</sup>] 503.1861; found 503.1848.

### Synthesis of DSO

A Ccompound (**2**) (250 mg, 0.49 mmol, 1 eq) was dissolved in 20 ml of DCM at 0 °C. Subsequently (55-60%, 422 mg, 2.45 mmol, 2.5 eq) *m*CPBA added slowly to the mixture was stirred at 0 °C for 1 hours. Next the organic layer washed with brine (30 mL) and dried over

anhydrous sodium sulphate. Then solvent was removed using rotary evaporation and crude product was purified by column chromatography using 50% DCM/Hexane as eluent gave green-yellow solid (209 mg, 82% yield). IR (KBr)  $\text{cm}^{-1}$ : 3040, 2922, 2917, 2852, 1592, 1081, 1055, 806.  $^1\text{H}$  NMR (500 MHz,  $\text{CDCl}_3$ )  $\delta$  9.24 (s, 1H), 9.14 (s, 1H), 8.63 (dd,  $J = 9.2, 1.1$  Hz, 2H), 8.58 (d,  $J = 9.2$  Hz, 2H), 8.33 (d,  $J = 6.2$  Hz, 4H), 8.22 (dd,  $J = 11.6, 9.2$  Hz, 4H), 7.63 – 7.57 (m, 5H), 7.57 – 7.49 (m, 3H), 7.15 (t,  $J = 7.8$  Hz, 9H), 2.28 (d,  $J = 6.6$  Hz, 13H), 1.56 (d,  $J = 4.6$  Hz, 19H).  $^{13}\text{C}\{^1\text{H}\}$  NMR (125 MHz,  $\text{CDCl}_3$ )  $\delta$  142.96 – 141.04, 139.14, 138.16, 130.99, 130.08, 125.27, 121.30, 120.62, 118.43, 35.45, 31.85, 21.40. HRMS: Calculated mass  $\text{C}_{34}\text{H}_{31}\text{S}_2\text{O}_2$  [(M+H) $^+$ ] 535.1760; found 535.1752.

### Synthesis of DSO<sub>2</sub>

A Ccompound (**2**) (250 mg, 0.49 mmol, 1 eq) was dissolved in 20 ml of DCM at 0 °C. Subsequently *m*CPBA (55-75%, 422 mg, 2.45 mmol, 5 eq) added slowly to the mixture was stirred at 0 °C for 1 hours. Next the organic layer washed with brine (30 mL) and dried over anhydrous sodium sulphate. Then solvent was removed using rotary evaporation and crude product was purified by column chromatography using 50% DCM/Hexane as eluent gave green-yellow solid (224 mg, 88% yield).  $^1\text{H}$  NMR (500 MHz,  $\text{CDCl}_3$ )  $\delta$  9.74 (s, 1H), 9.05 (d,  $J = 9.3$  Hz, 2H), 8.38 (s, 2H), 8.33 (d,  $J = 9.4$  Hz, 2H), 7.93 (d,  $J = 8.4$  Hz, 4H), 7.30 – 7.23 (m, 4H), 2.33 (s, 6H), 1.54 (s, 9H).  $^{13}\text{C}\{^1\text{H}\}$  NMR (125 MHz,  $\text{CDCl}_3$ )  $\delta$  151.36, 144.50, 138.84, 133.35, 132.23, 132.15, 130.05, 129.90, 128.15, 127.78, 126.55, 126.08, 122.73, 121.80, 35.50, 31.83, 21.70. IR (KBr)  $\text{cm}^{-1}$ : 3065, 2957, 2925, 2854, 1589, 1155, 1085, 664. HRMS: Calculated mass  $\text{C}_{34}\text{H}_{30}\text{O}_4\text{S}_2\text{Na}$  [(M+Na) $^+$ ] 589.1477; found 589.1491.

## Photophysical studies

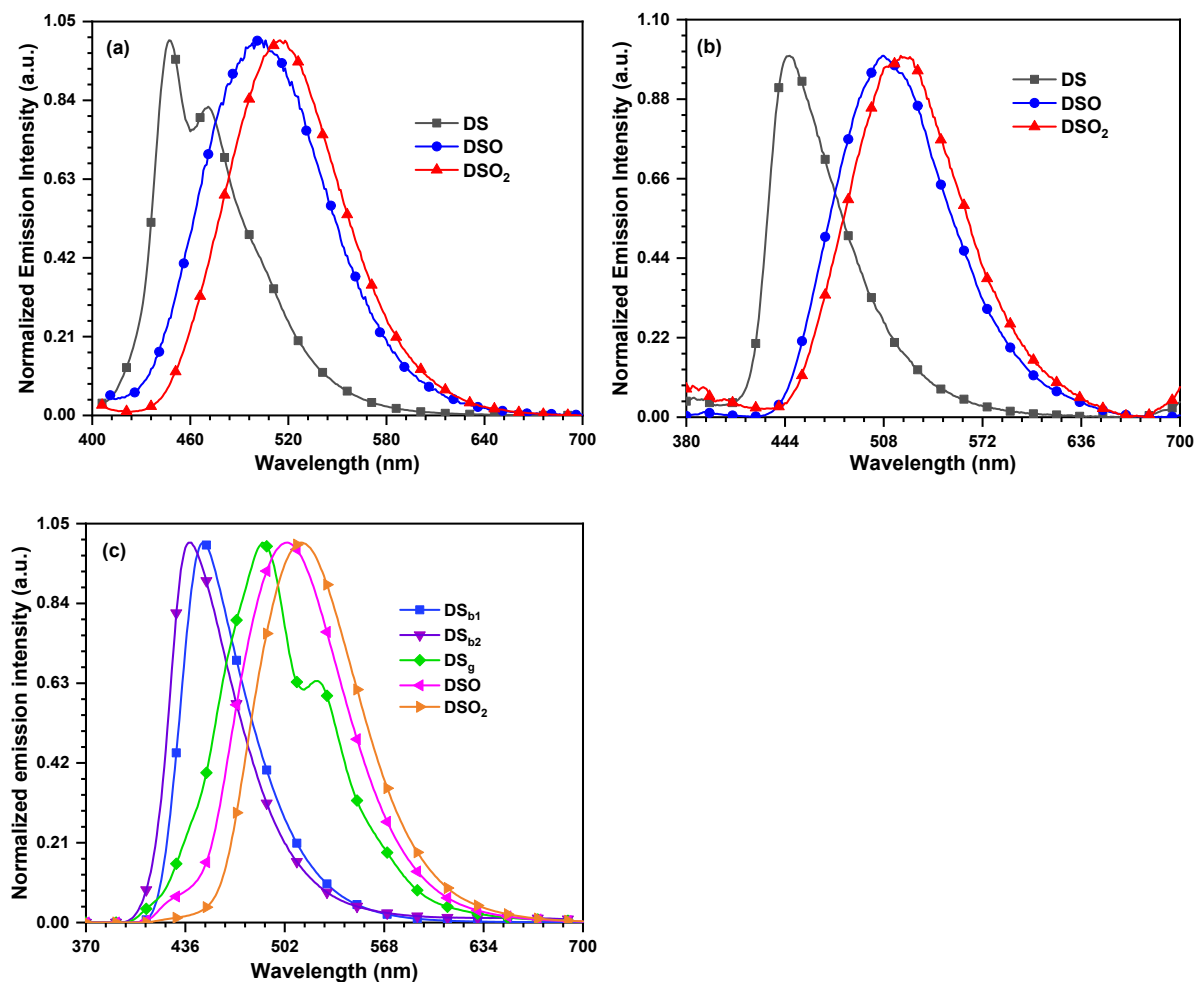

**Fig. S1.** (a) Emission spectra of all dyes in (a) thin film ( $\lambda_{ex} = 390$  nm), (b) solid ( $\lambda_{ex} = 370$  nm), and (c) crystal ( $\lambda_{ex} = 360$  nm).

**Table S1.** Summary of photophysical properties.

| Dye | $\lambda_{max}$ (nm ( $\epsilon_{max}$ , $M^{-1} cm^{-1} \times 10^3$ )) <sup>a</sup> | $\lambda_{em}$ (Sol <sup>b</sup> / film <sup>c</sup> / solid <sup>d</sup> ) (nm) ( $\Phi_{PL}$ % (Sol / film)) <sup>e</sup> | Stokes shift ( $cm^{-1}$ ) | FWHM (Sol / film / solid) |
|-----|---------------------------------------------------------------------------------------|-----------------------------------------------------------------------------------------------------------------------------|----------------------------|---------------------------|
| DS  | 400, 382, 370 (36.80), 297, 287 (33.06), 248 (71.08)                                  | 430(0.13) / 478(0.56)/ 447                                                                                                  | 1077                       | 52/ 57/ 53                |
| DSO | 375 (62.95), 358(52.43), 311, 289 (60.49), 278, 247 (84.86)                           | 430(0.13) / 478(0.68)/ 507                                                                                                  | 3411                       | 39/ 89/ 86                |

- a. Absorption measured in dichloromethane solution using  $10^{-5}$  M.  
b. Emission measured in dichloromethane solution using  $10^{-6}$  M, c. thin film and d. solid.  
e. Absolute photoluminescence quantum yields calculated by calibrated integrated sphere.

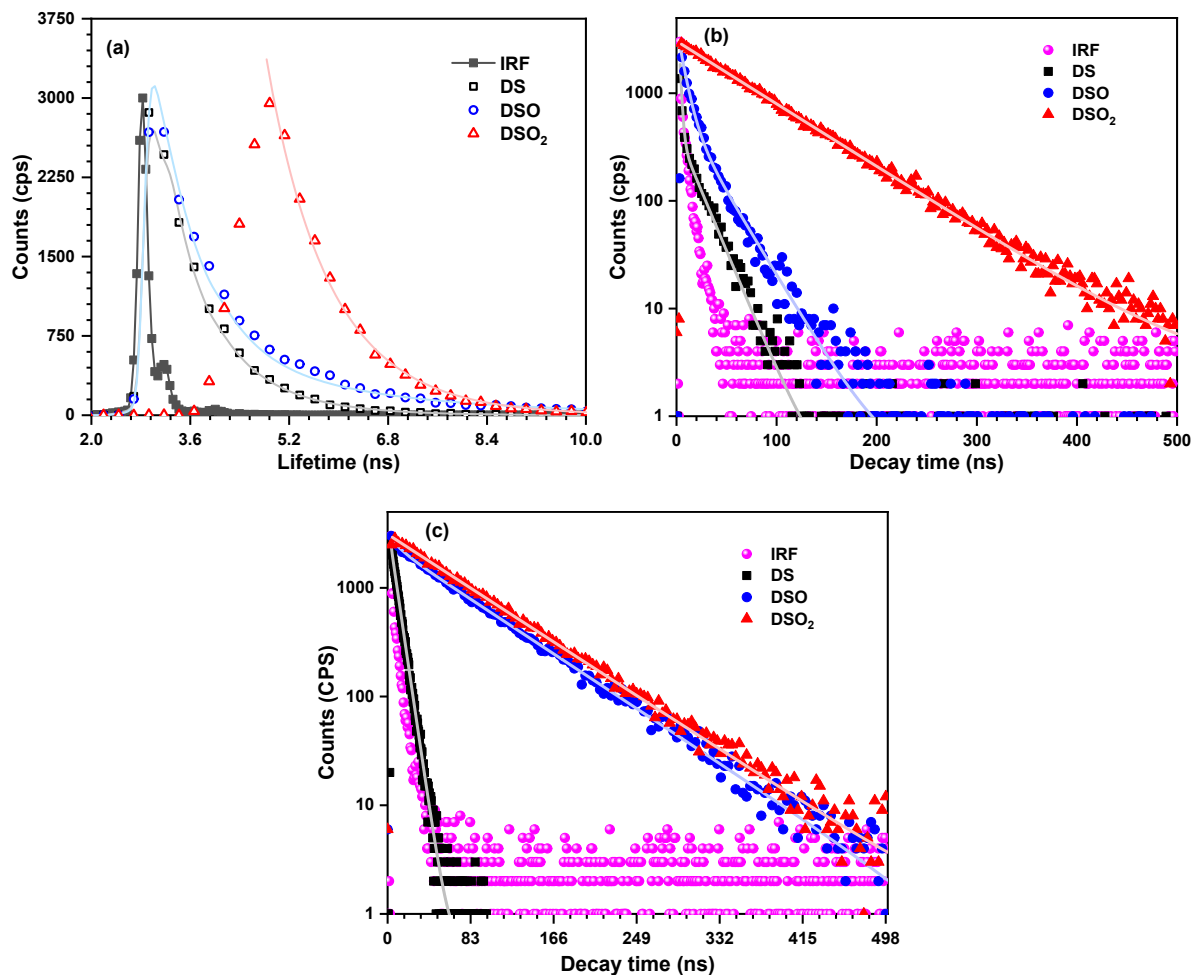

**Figure S2.** Lifetime decay of all dyes in (a) solution (b) thin film (c) solid.

**Table S2.** Lifetime decay of all dyes in solution, thin film and solid.

| States    | Dyes             | $\tau_1$<br>(ns) | $\tau_2$<br>(ns) | Average $\tau$<br>(ns) | $\chi^2$ |
|-----------|------------------|------------------|------------------|------------------------|----------|
| Solution  | DS               | 0.40             | 1.0              | 0.70                   | 1.04     |
|           | DSO              | 0.65             | 2.75             | 1.61                   | 0.96     |
|           | DSO <sub>2</sub> | 0.50             | 1.30             | 1.12                   | 0.97     |
| Thin film | DS               | 1.80             | 19.50            | 14.26                  | 0.92     |
|           | DSO              | 7.0              | 28.0             | 18.60                  | 0.90     |

|       |                |       |       |       |      |
|-------|----------------|-------|-------|-------|------|
|       | $\text{DSO}_2$ | 74.38 | -     | 74.38 | 1.05 |
|       | DS             | 0.60  | 6.90  | 6.80  | 0.90 |
| Solid | DSO            | 11.87 | 71.73 | 69.99 | 1.15 |
|       | $\text{DSO}_2$ | 72.75 | -     | 72.75 | 1.10 |

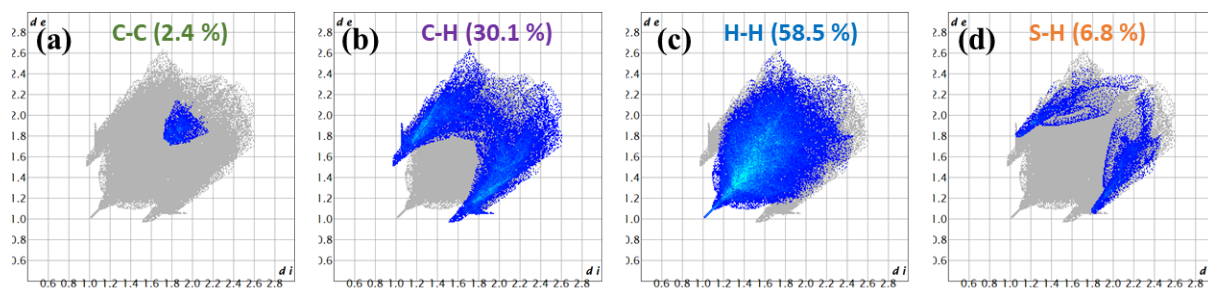

**Figure S3.** Decomposed Hirshfeld surface plots of  $\text{DS}_{b2}$  showing contributions from (a)  $\text{C}\cdots\text{C}$ , (b)  $\text{C}\cdots\text{H}$ , (c)  $\text{H}\cdots\text{H}$  and (d)  $\text{S}\cdots\text{H}$  interactions.

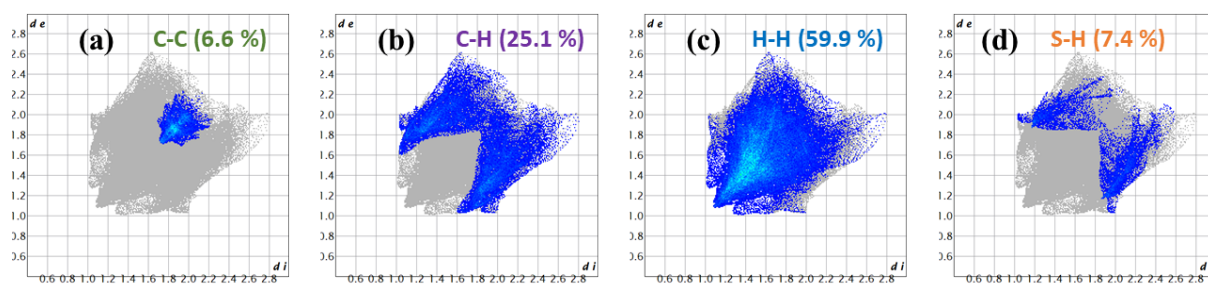

**Figure S4.** Decomposed Hirshfeld surface plots of  $\text{DS}_g$  showing contributions from (a)  $\text{C}\cdots\text{C}$ , (b)  $\text{C}\cdots\text{H}$ , (c)  $\text{H}\cdots\text{H}$  and (d)  $\text{S}\cdots\text{H}$  interactions.

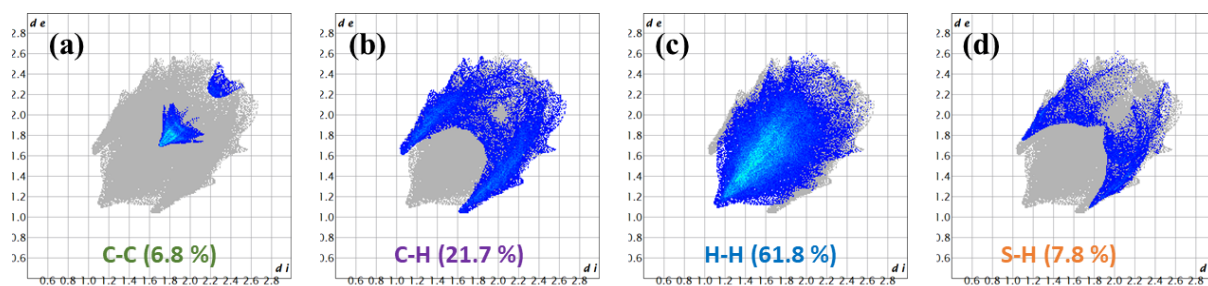

**Figure S5.** Decomposed Hirshfeld surface plots of  $\text{DS}_{b1}$  showing contributions from (a)  $\text{C}\cdots\text{C}$ , (b)  $\text{C}\cdots\text{H}$ , (c)  $\text{H}\cdots\text{H}$  and (d)  $\text{S}\cdots\text{H}$  interactions.

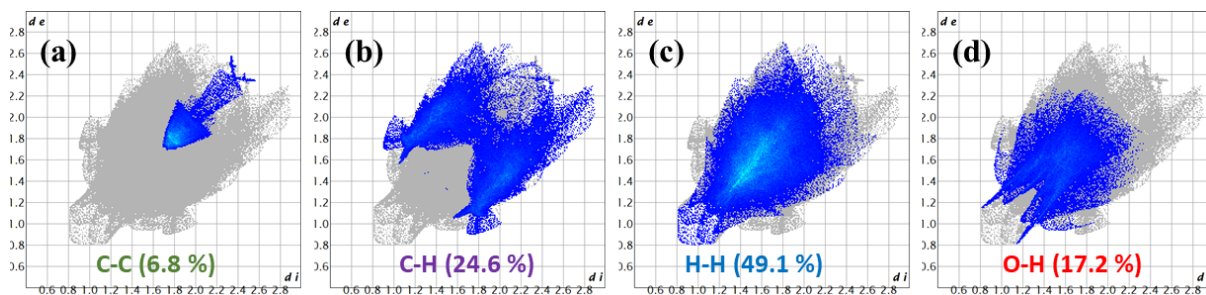

**Figure S6.** Decomposed Hirshfeld surface plots of **DSO** showing contributions from (a)  $C\cdots C$ , (b)  $C\cdots H$ , (c)  $S\cdots H$ , and (d)  $O\cdots H$  interactions.

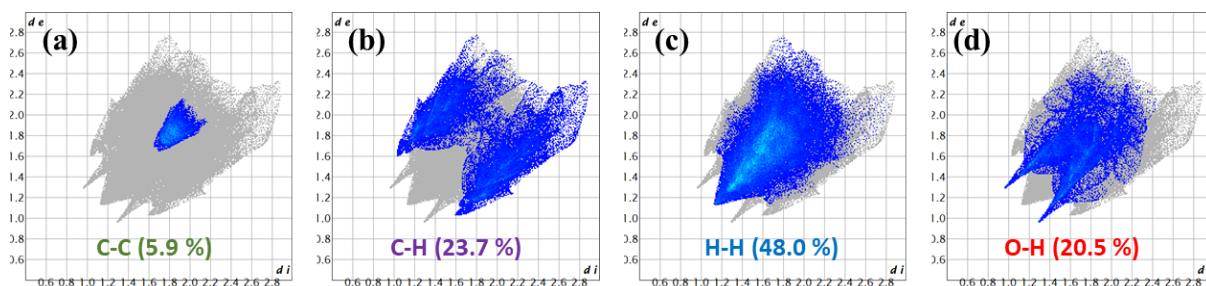

**Figure S7.** Decomposed Hirshfeld surface plots of **DSO<sub>2</sub>** showing contributions from (a)  $C\cdots C$ , (b)  $C\cdots H$ , and (c)  $O\cdots H$  interactions.

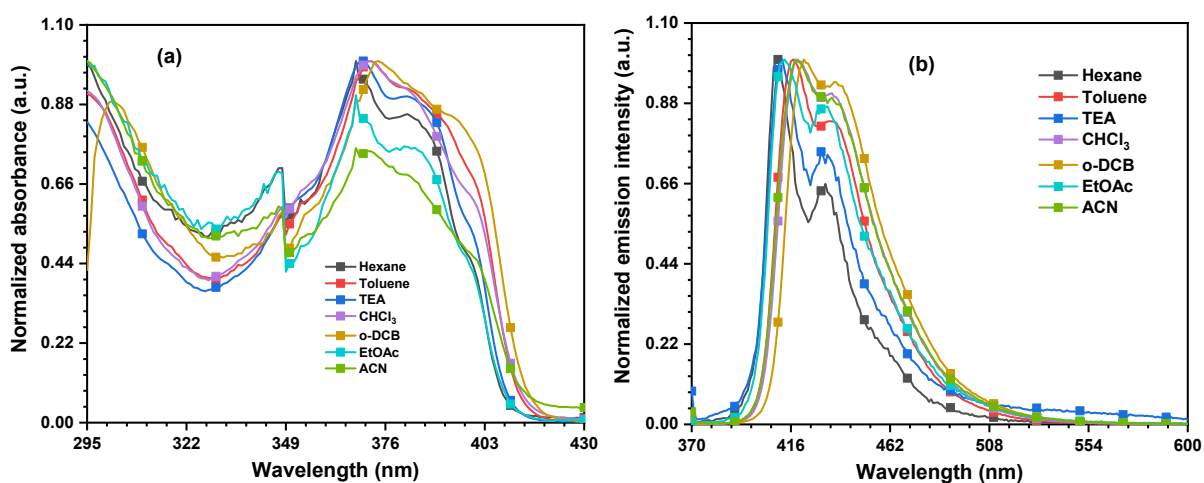

**Fig. S8.** (a) Absorption, (b) emission spectra of **DS** recorded in different solvents.

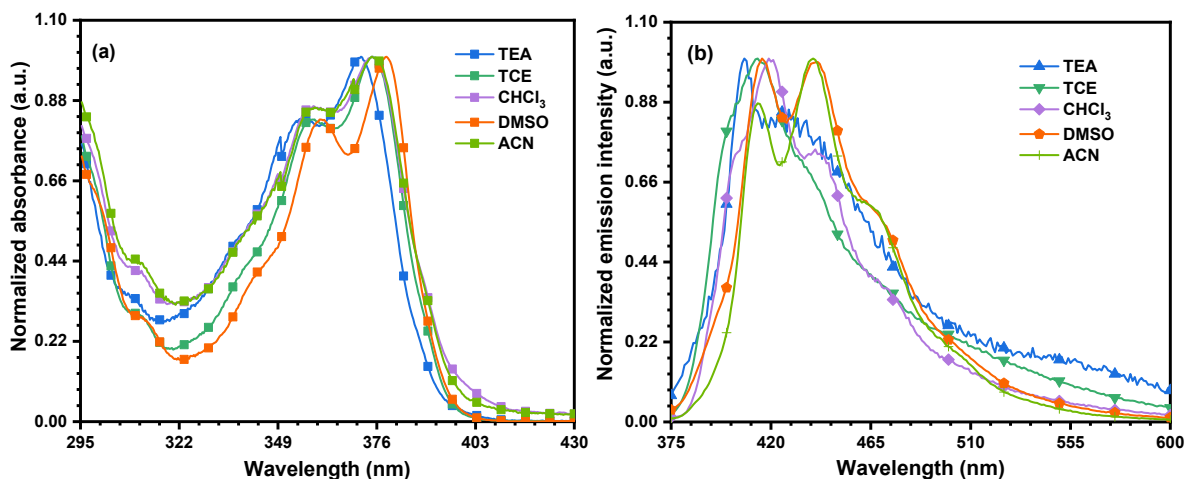

Fig. S9. (a) Absorption, (b) emission spectra of **DSO** recorded in different solvents.

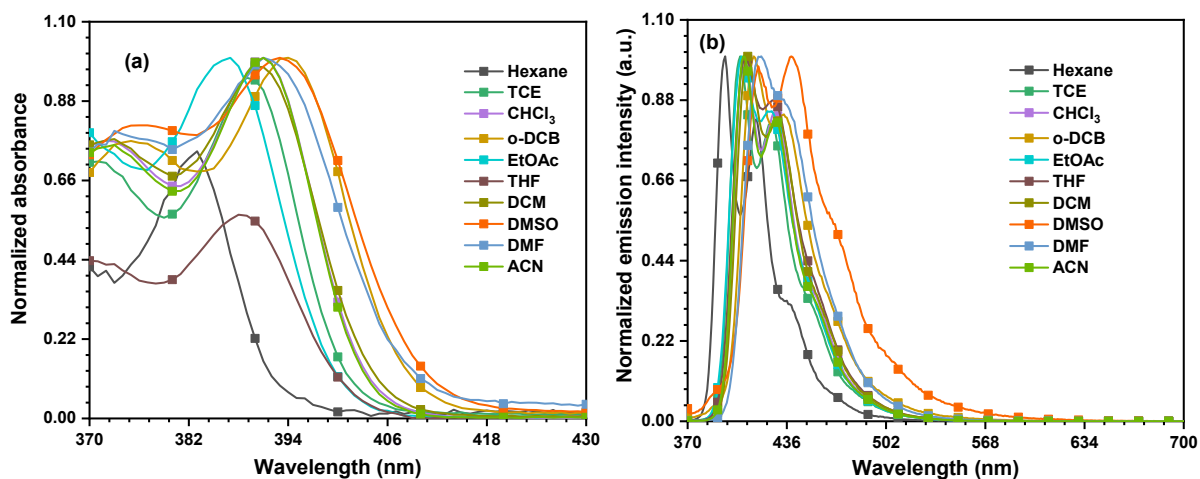

Fig. S10. (a) Absorption, (b) emission spectra of **DSO<sub>2</sub>** recorded in different solvents.

Table S3. Solvatochromic data of **DS** in various solvents.

| Solvent | $E_{N_T}^N$ | Orientation    |                | $\lambda_{abs}$ (nm) | $\lambda_{em}$ (nm) | Stokes Shift (nm) | $\Delta\nu$ (cm <sup>-1</sup> ) |
|---------|-------------|----------------|----------------|----------------------|---------------------|-------------------|---------------------------------|
|         |             | Polarizability | ( $\Delta f$ ) |                      |                     |                   |                                 |
| Hex     | 0.009       | 0.012          | 368            | 409                  | 2724.035            | 41                |                                 |
| Tol     | 0.099       | 0.014          | 371            | 416                  | 2915.716            | 45                |                                 |
| TEA     | 0.043       | 0.045          | 369            | 411                  | 2769.370            | 42                |                                 |
| TCE     | 0.160       | 0.085          | 372            | 416                  | 2843.258            | 44                |                                 |
| oDCB    | 0.225       | 0.186          | 371            | 419                  | 3087.829            | 48                |                                 |
| EtOAc   | 0.228       | 0.199          | 373            | 422                  | 3112.969            | 49                |                                 |
| ACN     | 0.460       | 0.305          | 368            | 419                  | 3307.564            | 51                |                                 |

Table S4. Solvatochromic data of **DSO** in various solvents.

| Solvent | $E_{N_T}^N$ | Orientation    |                | $\lambda_{abs}$ (nm) | $\lambda_{em}$ (nm) | Stokes Shift (nm) | $\Delta\nu$ (cm <sup>-1</sup> ) |
|---------|-------------|----------------|----------------|----------------------|---------------------|-------------------|---------------------------------|
|         |             | Polarizability | ( $\Delta f$ ) |                      |                     |                   |                                 |

|                   |       |       |     |     |            |    |
|-------------------|-------|-------|-----|-----|------------|----|
| Hex               | 0.009 | 0.012 | 371 | 408 | 2444.37398 | 37 |
| TCE               | 0.160 | 0.085 | 374 | 414 | 2583.37854 | 40 |
| CHCl <sub>3</sub> | 0.259 | 0.149 | 374 | 420 | 2928.4441  | 46 |
| DMSO              | 0.444 | 0.263 | 378 | 440 | 3727.75373 | 62 |
| ACN               | 0.460 | 0.305 | 375 | 439 | 3887.62339 | 64 |

**Table S5.** Solvatochromic data of DSO<sub>2</sub> in various solvents.

| Solvent           | E <sup>N</sup> <sub>T</sub> | Orientation         |  | λ <sub>abs</sub> (nm) | λ <sub>em</sub> (nm) | Stokes Shift (nm) | Δν (cm <sup>-1</sup> ) |
|-------------------|-----------------------------|---------------------|--|-----------------------|----------------------|-------------------|------------------------|
|                   |                             | Polarizability (Δf) |  |                       |                      |                   |                        |
| Hex               | 0.009                       | 0.012               |  | 383                   | 394                  | 728.94991         | 11                     |
| TCE               | 0.160                       | 0.085               |  | 390                   | 407                  | 1071.00107        | 17                     |
| CHCl <sub>3</sub> | 0.259                       | 0.149               |  | 391                   | 408                  | 1065.64365        | 17                     |
| <i>o</i> DCB      | 0.225                       | 0.186               |  | 394                   | 414                  | 1226.12129        | 20                     |
| EtOAc             | 0.228                       | 0.199               |  | 386                   | 406                  | 1276.19388        | 20                     |
| THF               | 0.207                       | 0.210               |  | 389                   | 408                  | 1197.13695        | 19                     |
| DCM               | 0.309                       | 0.217               |  | 390                   | 409                  | 1191.14789        | 19                     |
| DMSO              | 0.444                       | 0.263               |  | 392                   | 416                  | 1471.74254        | 24                     |
| DMF               | 0.386                       | 0.276               |  | 391                   | 418                  | 1652.00259        | 27                     |

**Table S6.** Solvatochromic properties of all dyes.

| Dye              | Chemical formula                                              | R <sup>2</sup> | Onsager radius      | Slope     | Δμ     |
|------------------|---------------------------------------------------------------|----------------|---------------------|-----------|--------|
| DS               | C <sub>34</sub> H <sub>30</sub> S <sub>2</sub>                | 0.90           | 4.69 Å <sup>o</sup> | 1929.9177 | 4.45 D |
| DSO              | C <sub>34</sub> H <sub>30</sub> O <sub>2</sub> S <sub>2</sub> | 0.99           | 4.75 Å <sup>o</sup> | 6005.23   | 8.06 D |
| DSO <sub>2</sub> | C <sub>34</sub> H <sub>30</sub> O <sub>4</sub> S <sub>2</sub> | 0.86           | 4.81 Å <sup>o</sup> | 2773.64   | 5.54 D |

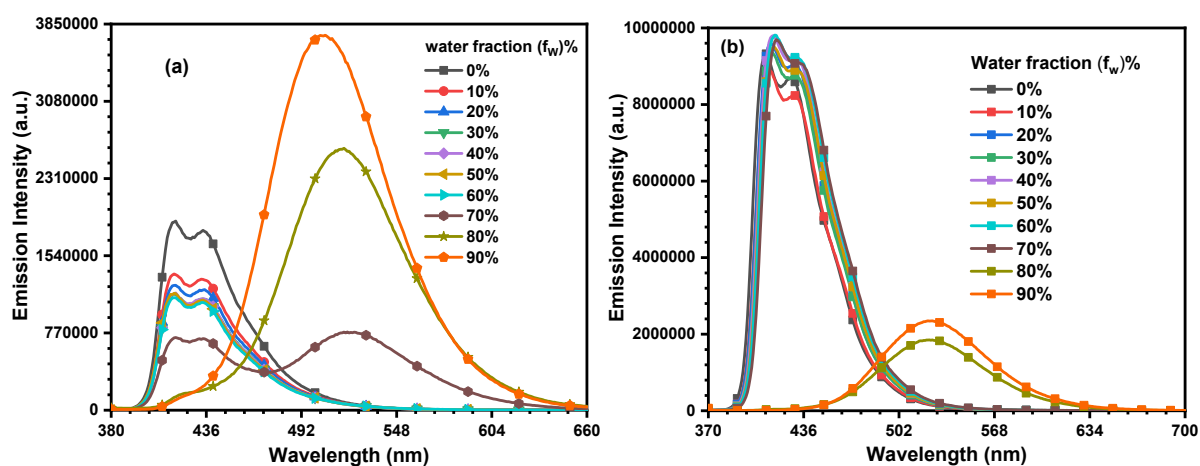

**Figure S11.** AIE study of (a) DS and (b) DSO<sub>2</sub> in THF/H<sub>2</sub>O mixture.

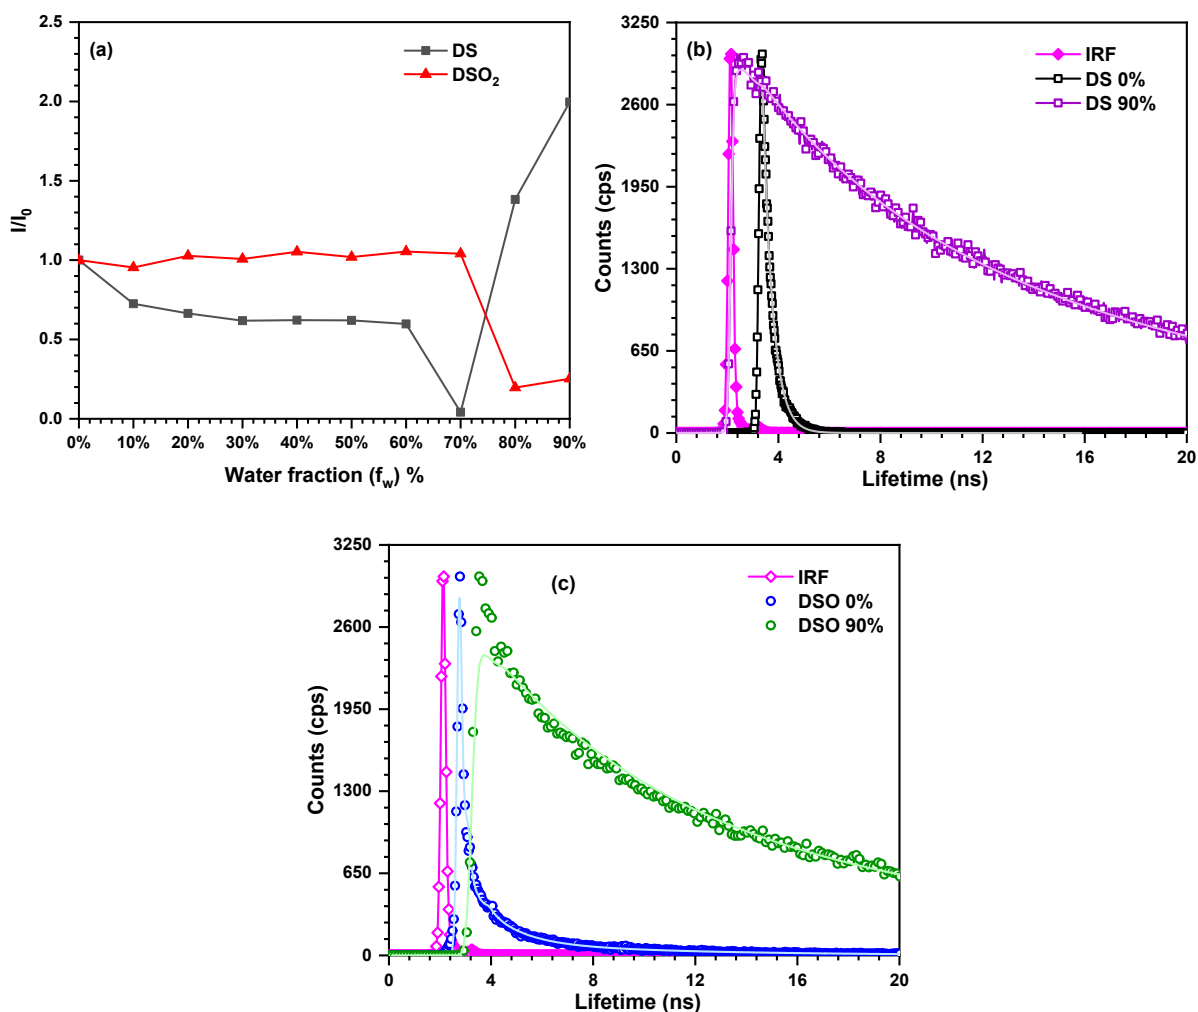

**Figure S12.** (a)  $I/I_0$  plot of DS and  $DSO_2$ , Lifetime decay of (b) DS, (c) DSO in aggregated fractions.

## Crystallographic data

**Table S7.** Selected bond lengths and angles observed in DS, DSO and  $DSO_2$

| Compound  | C-S, Å     | S=O, Å     | C-S-C, °  | C-S-C-C, ° |
|-----------|------------|------------|-----------|------------|
| $DS_{b1}$ | 1.7757(15) | -          | 101.90(7) | 112.19(13) |
|           | 1.7763(15) | -          | 101.59(7) | -68.39(13) |
| $DS_{b2}$ | 1.7769(15) | -          | 102.97(7) | 12.81(14)  |
|           | 1.7752(15) | -          | 103.03(7) | 21.37(14)  |
| $DS_g$    | 1.7732(13) | -          | 106.43(6) | -11.79(12) |
|           | 1.7702(13) | -          | 103.65(6) | 13.22(11)  |
| DSO       | 1.457(3)   | 1.457(3)   | 97.25(6)  | 90.12(11)  |
|           | 1.4853(12) | 1.4853(12) | 94.29(7)  | -87.36     |
| $DSO_2$   | 1.7807(16) | 1.4398(13) | 103.62(8) | 92.68      |
|           | 1.7740(17) | 1.4388(13) | 103.50(8) | -111.73    |

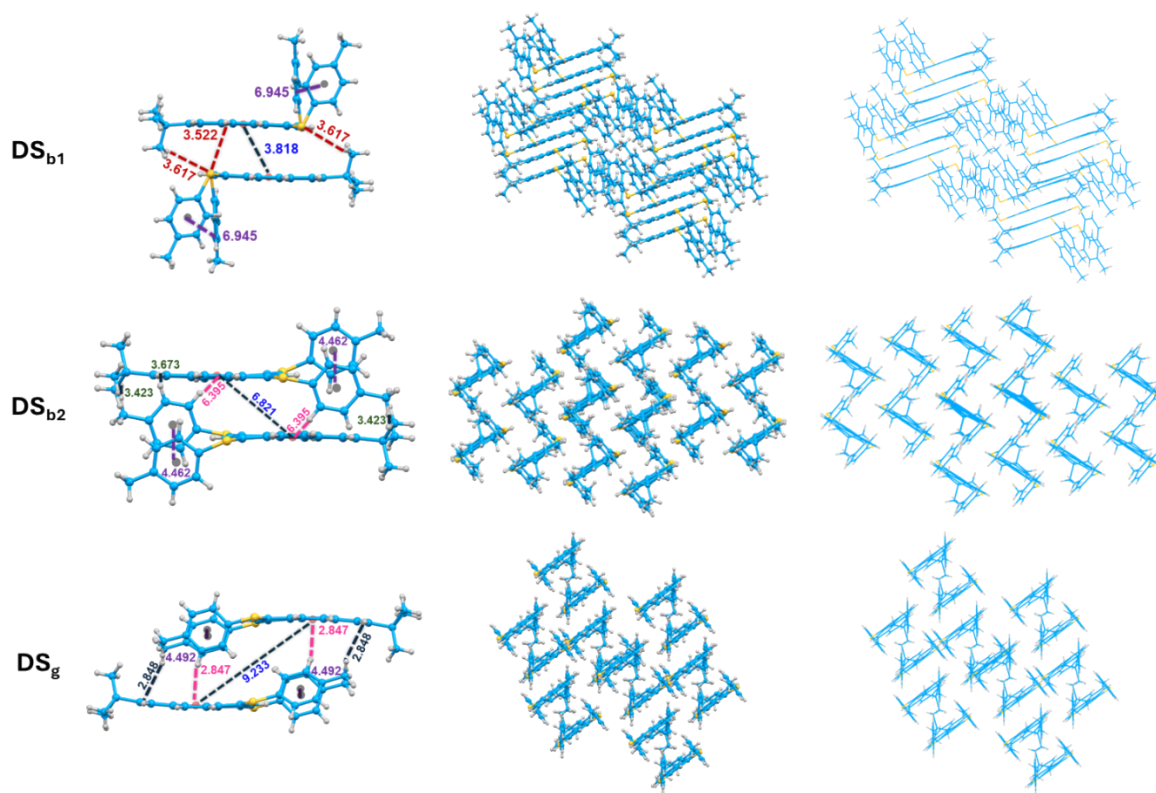

**Figure S13.** Packing analysis of  $DS_{b1}$ ,  $DS_{b2}$ , and  $DS_g$  crystals.

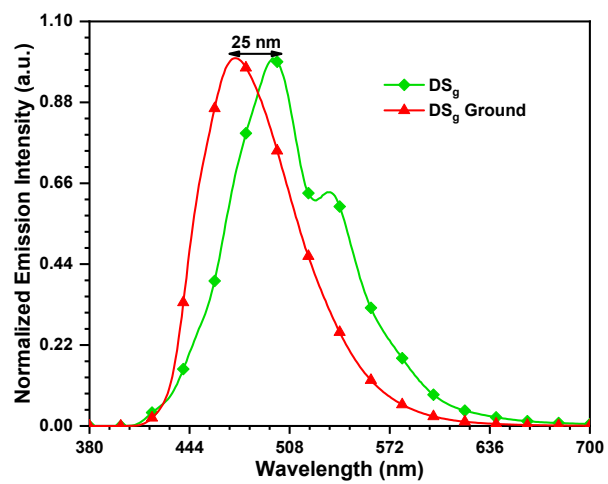

**Figure S14.** Emission spectrum of mechanochromic behaviour of  $DS_g$  crystal ( $\lambda_{ex} = 370$  nm).

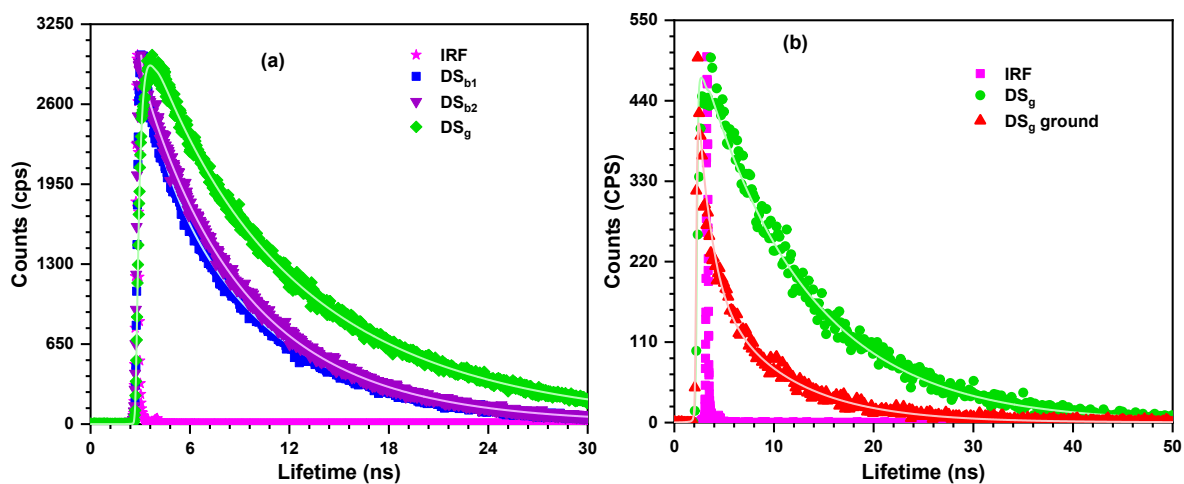

**Figure S15.** Lifetime decay of (a) DS<sub>b1</sub>, DS<sub>b2</sub>, and DS<sub>g</sub> crystals, (b) DS<sub>g</sub> and DS<sub>g</sub> ground crystals.

**Table S8.** Kinetic parameter of DS polymorph crystals.

| Compound         | PLQYs (%) | $\tau$ (ns) | $k_r$ (s <sup>-1</sup> ) | $k_{nr}$ (s <sup>-1</sup> ) |
|------------------|-----------|-------------|--------------------------|-----------------------------|
| DS <sub>b1</sub> | 33.8      | 6.66        | $5.08 \times 10^7$       | $9.94 \times 10^7$          |
| DS <sub>b2</sub> | 48.6      | 6.73        | $7.22 \times 10^7$       | $7.64 \times 10^7$          |
| DS <sub>g</sub>  | 62.3      | 10.47       | $5.95 \times 10^7$       | $3.60 \times 10^7$          |

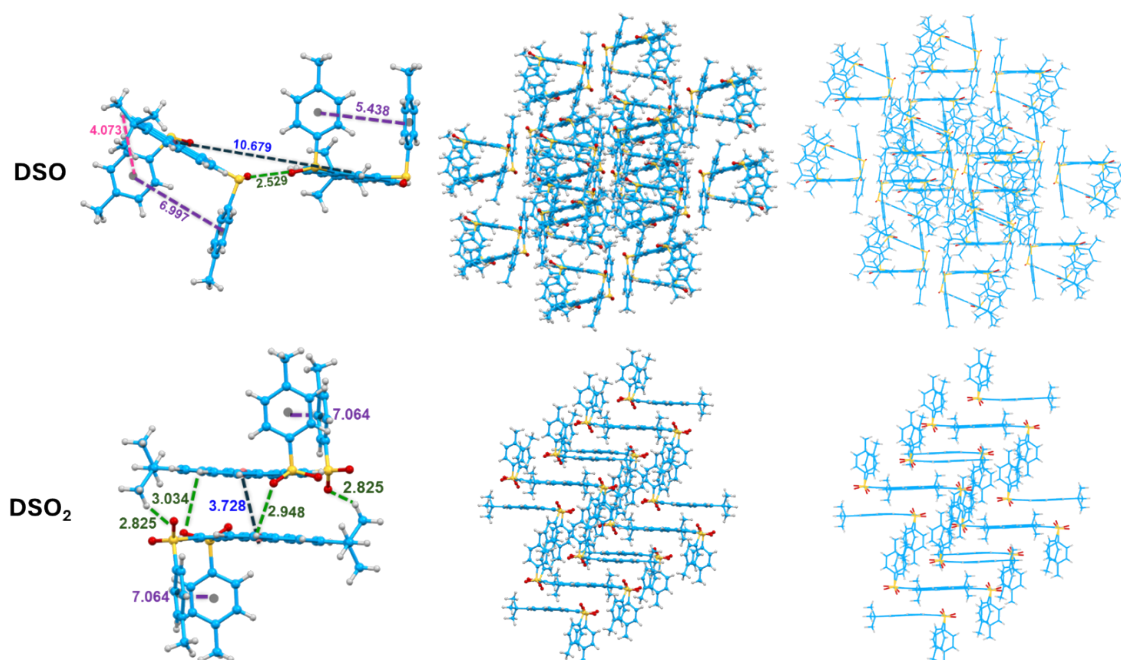

**Figure S16.** Packing analysis of DSO, and DSO<sub>2</sub> crystals.

## Theoretical studies

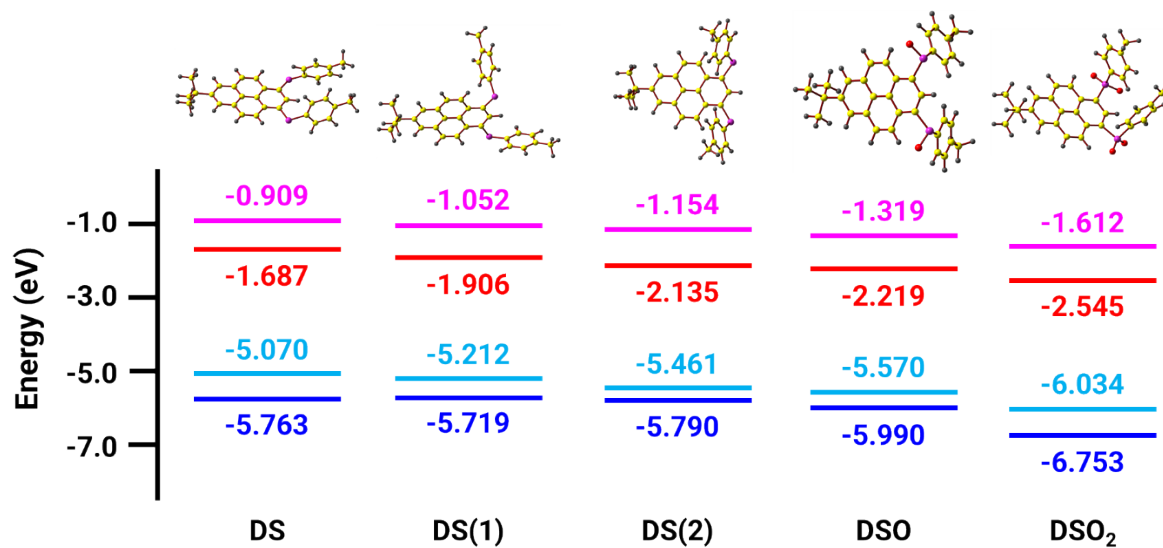

**Figure S17.** Frontier molecular orbital (FMOs) energy level of all dyes.

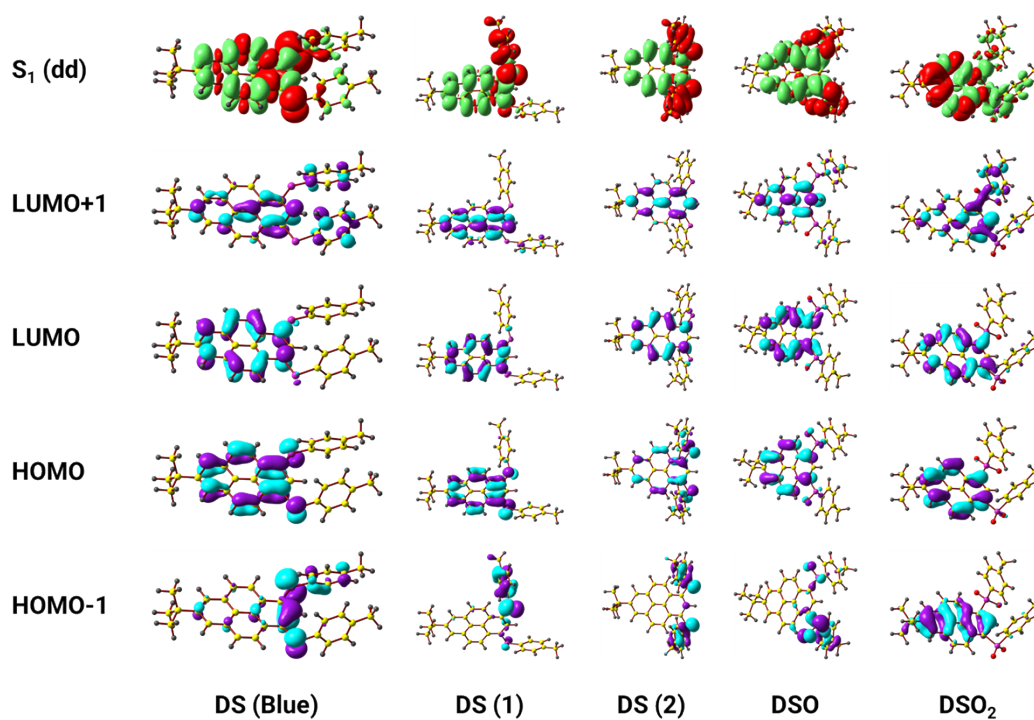

**Figure S18.** FMOs HOMO/HOMO-1 and LUMO/LUMO+1 electronic distributions and difference density plot for S<sub>1</sub> state of all dyes.

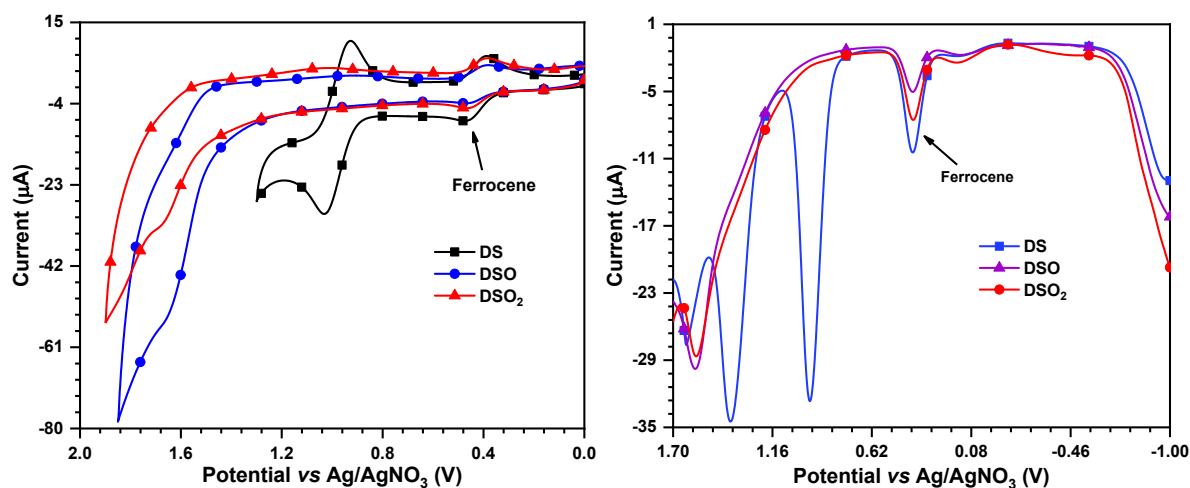

**Figure S19.** (a) Cyclic voltammetry and (b) DPV of all dyes recorded in DCM.

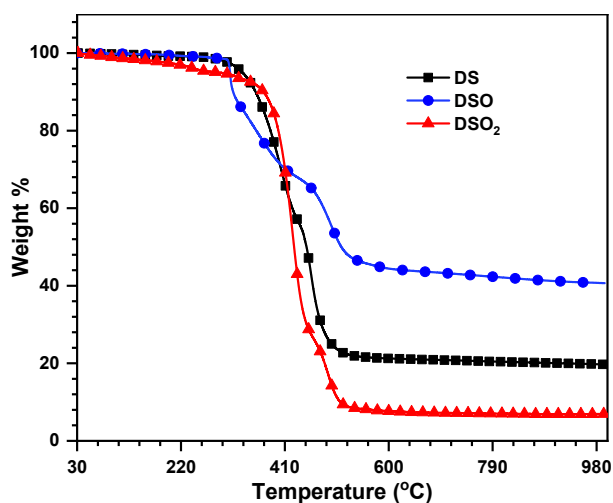

**Figure S20.** Thermal stability of all dyes.

**Table S9.** Thermal and electrochemical properties of all dyes.

| Dye              | $E_{ox}$ (V) <sup>a</sup> | HOMO/LUMO (V) <sup>b</sup> | HOMO/LUMO (V) <sup>c</sup> | $E_{0-0}$ (V) <sup>d</sup> | $T_{10d}$ (°C) <sup>e</sup> |
|------------------|---------------------------|----------------------------|----------------------------|----------------------------|-----------------------------|
| DS               | 0.9563                    | -5.756/-2.604              | -5.070/-1.687              | 393                        | 353                         |
| DSO              | 1.5830                    | -6.383/-3.145              | -5.570/-2.219              | 383                        | 312                         |
| DSO <sub>2</sub> | 1.5713                    | -6.371/-3.260              | -6.034/-2.545              | 398                        | 375                         |

a. Measured for  $2 \times 10^{-4}$  M DCM and the potentials are quoted with reference to ferrocene as internal standard.

b.  $HOMO = -(4.8 + E_{ox})$ , c.  $LUMO = HOMO - E_{0-0}$ .

- c. HOMO and LUMO calculated by theory.
- d. Optical band gap obtained from the intersection of absorption and emission spectra.
- e. Temperature corresponding to 10% weight loss.

**Table S10.** Kinetic parameter of all dyes in various water fractions

| Compound | Fraction                 | PLQYs (%) | $\tau$ (ns) | $k_r$ (s <sup>-1</sup> ) | $k_{nr}$ (s <sup>-1</sup> ) |
|----------|--------------------------|-----------|-------------|--------------------------|-----------------------------|
| DS       | 0% H <sub>2</sub> O      | 18.09     | 0.3851      | $4.70 \times 10^8$       | $2.13 \times 10^9$          |
|          | 99% THF/H <sub>2</sub> O | 50.50     | 15.2533     | $3.31 \times 10^7$       | $3.25 \times 10^7$          |
| DSO      | 0% H <sub>2</sub> O      | 14.25     | 2.8476      | $5.01 \times 10^7$       | $3.01 \times 10^8$          |
|          | 99% THF/H <sub>2</sub> O | 76.77     | 19.4071     | $3.96 \times 10^7$       | $1.20 \times 10^7$          |

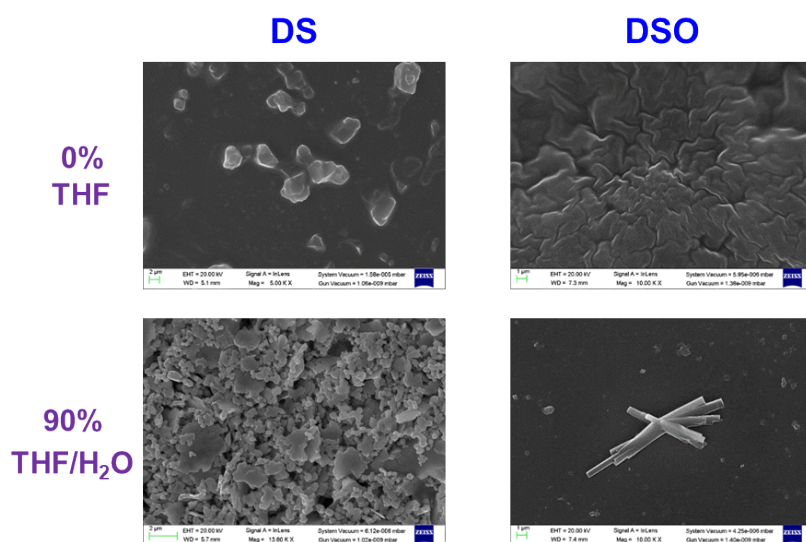

**Figure S21.** Solid state SEM images of all dyes.

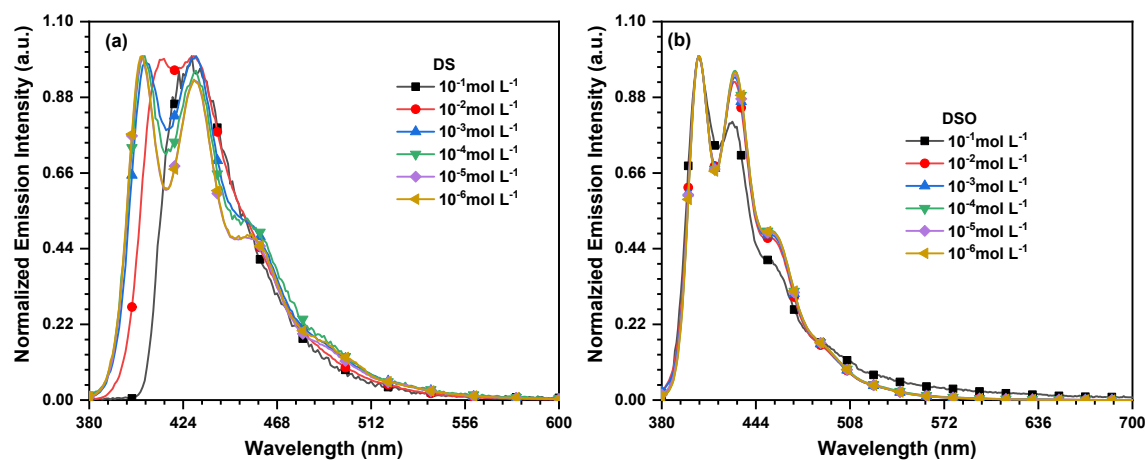

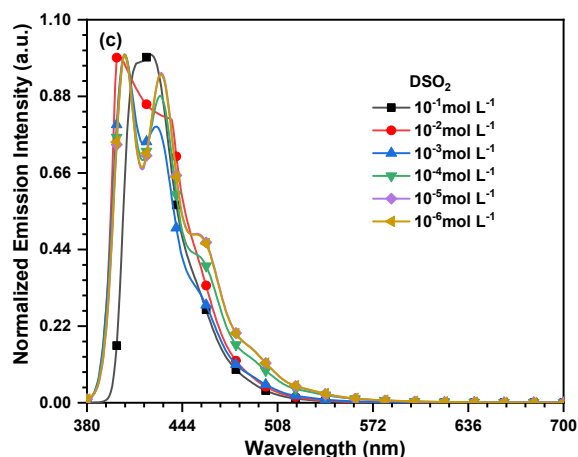

**Figure S22.** Concentration dependent emission of (a) DS, (b) DSO, and (c) DSO<sub>2</sub>.

**Table S11.** Crystal data and structure refinement for DS<sub>b1</sub>

|                                             |                                                               |
|---------------------------------------------|---------------------------------------------------------------|
| CCDC No                                     | 2542598                                                       |
| Empirical formula                           | C <sub>34</sub> H <sub>30</sub> S <sub>2</sub>                |
| Formula weight                              | 502.70                                                        |
| Temperature/K                               | 100.0                                                         |
| Crystal system                              | triclinic                                                     |
| Space group                                 | P-1                                                           |
| a/Å                                         | 9.6739(2)                                                     |
| b/Å                                         | 12.3529(2)                                                    |
| c/Å                                         | 12.9314(2)                                                    |
| α/°                                         | 118.4910(10)                                                  |
| β/°                                         | 98.7630(10)                                                   |
| γ/°                                         | 98.9760(10)                                                   |
| Volume/Å <sup>3</sup>                       | 1294.95(4)                                                    |
| Z                                           | 2                                                             |
| ρ <sub>calc</sub> /cm <sup>3</sup>          | 1.289                                                         |
| μ/mm <sup>-1</sup>                          | 0.228                                                         |
| F(000)                                      | 532.0                                                         |
| Crystal size/mm <sup>3</sup>                | 0.246 × 0.085 × 0.025                                         |
| Radiation                                   | MoKα (λ = 0.71073)                                            |
| 2θ range for data collection/°              | 3.712 to 52.836                                               |
| Index ranges                                | -12 ≤ h ≤ 12, -15 ≤ k ≤ 15, -16 ≤ l ≤ 16                      |
| Reflections collected                       | 44318                                                         |
| Independent reflections                     | 5309 [R <sub>int</sub> = 0.0386, R <sub>sigma</sub> = 0.0228] |
| Data/restraints/parameters                  | 5309/0/330                                                    |
| Goodness-of-fit on F <sup>2</sup>           | 1.180                                                         |
| Final R indexes [I ≥ 2σ (I)]                | R <sub>1</sub> = 0.0419, wR <sub>2</sub> = 0.1243             |
| Final R indexes [all data]                  | R <sub>1</sub> = 0.0456, wR <sub>2</sub> = 0.1290             |
| Largest diff. peak/hole / e Å <sup>-3</sup> | 0.48/-0.44                                                    |

**Table S12.** Crystal data and structure refinement for **DS<sub>b2</sub>**

|                                             |                                                               |
|---------------------------------------------|---------------------------------------------------------------|
| CCDC No                                     | 2542596                                                       |
| Empirical formula                           | C <sub>34</sub> H <sub>30</sub> S <sub>2</sub>                |
| Formula weight                              | 502.70                                                        |
| Temperature/K                               | 150.00                                                        |
| Crystal system                              | triclinic                                                     |
| Space group                                 | P-1                                                           |
| a/Å                                         | 9.8717(5)                                                     |
| b/Å                                         | 10.1637(5)                                                    |
| c/Å                                         | 14.9808(8)                                                    |
| α/°                                         | 93.7400(10)                                                   |
| β/°                                         | 93.3080(10)                                                   |
| γ/°                                         | 116.7710(10)                                                  |
| Volume/Å <sup>3</sup>                       | 1332.69(12)                                                   |
| Z                                           | 2                                                             |
| ρ <sub>calc</sub> /cm <sup>3</sup>          | 1.253                                                         |
| μ/mm <sup>-1</sup>                          | 0.221                                                         |
| F(000)                                      | 532.0                                                         |
| Crystal size/mm <sup>3</sup>                | 0.228 × 0.102 × 0.029                                         |
| Radiation                                   | MoKα (λ = 0.71073)                                            |
| 2θ range for data collection/°              | 4.512 to 52.914                                               |
| Index ranges                                | -12 ≤ h ≤ 12, -12 ≤ k ≤ 12, -18 ≤ l ≤ 18                      |
| Reflections collected                       | 53734                                                         |
| Independent reflections                     | 5489 [R <sub>int</sub> = 0.0354, R <sub>sigma</sub> = 0.0199] |
| Data/restraints/parameters                  | 5489/0/330                                                    |
| Goodness-of-fit on F <sup>2</sup>           | 1.041                                                         |
| Final R indexes [I ≥ 2σ (I)]                | R <sub>1</sub> = 0.0389, wR <sub>2</sub> = 0.1010             |
| Final R indexes [all data]                  | R <sub>1</sub> = 0.0457, wR <sub>2</sub> = 0.1059             |
| Largest diff. peak/hole / e Å <sup>-3</sup> | 0.30/-0.34                                                    |

**Table S13.** Crystal data and structure refinement for **DS<sub>g</sub>**

|                   |                                                |
|-------------------|------------------------------------------------|
| CCDC No           | 2542597                                        |
| Empirical formula | C <sub>34</sub> H <sub>30</sub> S <sub>2</sub> |
| Formula weight    | 502.7                                          |
| Temperature/K     | 100(2)                                         |
| Crystal system    | triclinic                                      |
| Space group       | P-1                                            |
| a/Å               | 9.8410(3)                                      |
| b/Å               | 12.1021(4)                                     |
| c/Å               | 12.1440(4)                                     |
| α/°               | 65.1220(10)                                    |
| β/°               | 88.5840(10)                                    |

|                                               |                                                               |
|-----------------------------------------------|---------------------------------------------------------------|
| $\gamma/^\circ$                               | 84.2020(10)                                                   |
| Volume/ $\text{\AA}^3$                        | 1305.14(7)                                                    |
| Z                                             | 2                                                             |
| $\rho_{\text{calc}}/\text{g/cm}^3$            | 1.279                                                         |
| $\mu/\text{mm}^{-1}$                          | 0.226                                                         |
| F(000)                                        | 532.0                                                         |
| Crystal size/ $\text{mm}^3$                   | $0.272 \times 0.203 \times 0.1$                               |
| Radiation                                     | Mo K $\alpha$ ( $\lambda = 0.71073$ )                         |
| $2\Theta$ range for data collection/ $^\circ$ | 3.698 to 53.724                                               |
| Index ranges                                  | $-12 \leq h \leq 12, -15 \leq k \leq 15, -15 \leq l \leq 15$  |
| Reflections collected                         | 49182                                                         |
| Independent reflections                       | 5588 [ $R_{\text{int}} = 0.0395, R_{\text{sigma}} = 0.0260$ ] |
| Data/restraints/parameters                    | 5588/78/361                                                   |
| Goodness-of-fit on $F^2$                      | 1.038                                                         |
| Final R indexes [ $I \geq 2\sigma(I)$ ]       | $R_1 = 0.0366, wR_2 = 0.1019$                                 |
| Final R indexes [all data]                    | $R_1 = 0.0390, wR_2 = 0.1048$                                 |
| Largest diff. peak/hole / $e \text{\AA}^{-3}$ | 0.32/-0.37                                                    |

**Table S14.** Crystal data and structure refinement for **DSO**

|                                               |                                                                |
|-----------------------------------------------|----------------------------------------------------------------|
| CCDC No                                       | 2542600                                                        |
| Empirical formula                             | $\text{C}_{34}\text{H}_{30}\text{O}_2\text{S}_2$               |
| Formula weight                                | 534.70                                                         |
| Temperature/K                                 | 100.00                                                         |
| Crystal system                                | triclinic                                                      |
| Space group                                   | P-1                                                            |
| a/ $\text{\AA}$                               | 13.5813(12)                                                    |
| b/ $\text{\AA}$                               | 13.7211(11)                                                    |
| c/ $\text{\AA}$                               | 14.8971(13)                                                    |
| $\alpha/^\circ$                               | 83.067(4)                                                      |
| $\beta/^\circ$                                | 77.368(4)                                                      |
| $\gamma/^\circ$                               | 85.922(4)                                                      |
| Volume/ $\text{\AA}^3$                        | 2686.2(4)                                                      |
| Z                                             | 4                                                              |
| $\rho_{\text{calc}}/\text{g/cm}^3$            | 1.322                                                          |
| $\mu/\text{mm}^{-1}$                          | 0.229                                                          |
| F(000)                                        | 1128.0                                                         |
| Crystal size/ $\text{mm}^3$                   | $0.4 \times 0.353 \times 0.23$                                 |
| Radiation                                     | MoK $\alpha$ ( $\lambda = 0.71073$ )                           |
| $2\Theta$ range for data collection/ $^\circ$ | 3.076 to 63.896                                                |
| Index ranges                                  | $-20 \leq h \leq 20, -20 \leq k \leq 20, -22 \leq l \leq 22$   |
| Reflections collected                         | 154427                                                         |
| Independent reflections                       | 18329 [ $R_{\text{int}} = 0.0839, R_{\text{sigma}} = 0.0529$ ] |
| Data/restraints/parameters                    | 18329/82/760                                                   |

|                                                |                                  |
|------------------------------------------------|----------------------------------|
| Goodness-of-fit on $F^2$                       | 1.028                            |
| Final R indexes [ $I \geq 2\sigma(I)$ ]        | $R_1 = 0.0499$ , $wR_2 = 0.1157$ |
| Final R indexes [all data]                     | $R_1 = 0.0737$ , $wR_2 = 0.1318$ |
| Largest diff. peak/hole / $e \text{ \AA}^{-3}$ | 0.43/-0.41                       |

**Table S15.** Crystal data and structure refinement for **DSO<sub>2</sub>**

|                                                |                                                                    |
|------------------------------------------------|--------------------------------------------------------------------|
| CCDC No                                        | 2542599                                                            |
| Empirical formula                              | $C_{34}H_{30}O_4S_2$                                               |
| Formula weight                                 | 566.70                                                             |
| Temperature/K                                  | 103.0                                                              |
| Crystal system                                 | triclinic                                                          |
| Space group                                    | P-1                                                                |
| a/Å                                            | 9.7203(3)                                                          |
| b/Å                                            | 12.4319(3)                                                         |
| c/Å                                            | 13.7673(4)                                                         |
| $\alpha/^\circ$                                | 71.5440(10)                                                        |
| $\beta/^\circ$                                 | 70.8070(10)                                                        |
| $\gamma/^\circ$                                | 67.0850(10)                                                        |
| Volume/Å <sup>3</sup>                          | 1412.79(7)                                                         |
| Z                                              | 2                                                                  |
| $\rho_{\text{calc}}/\text{cm}^3$               | 1.332                                                              |
| $\mu/\text{mm}^{-1}$                           | 0.227                                                              |
| F(000)                                         | 596.0                                                              |
| Crystal size/mm <sup>3</sup>                   | $0.213 \times 0.158 \times 0.098$                                  |
| Radiation                                      | MoK $\alpha$ ( $\lambda = 0.71073$ )                               |
| 2 $\theta$ range for data collection/ $^\circ$ | 3.208 to 52.798                                                    |
| Index ranges                                   | $-12 \leq h \leq 12$ , $-15 \leq k \leq 15$ , $-17 \leq l \leq 17$ |
| Reflections collected                          | 73288                                                              |
| Independent reflections                        | 5801 [ $R_{\text{int}} = 0.0633$ , $R_{\text{sigma}} = 0.0321$ ]   |
| Data/restraints/parameters                     | 5801/0/366                                                         |
| Goodness-of-fit on $F^2$                       | 1.037                                                              |
| Final R indexes [ $I \geq 2\sigma(I)$ ]        | $R_1 = 0.0393$ , $wR_2 = 0.1004$                                   |
| Final R indexes [all data]                     | $R_1 = 0.0508$ , $wR_2 = 0.1090$                                   |
| Largest diff. peak/hole / $e \text{ \AA}^{-3}$ | 0.32/-0.38                                                         |

# NMR Spectrum

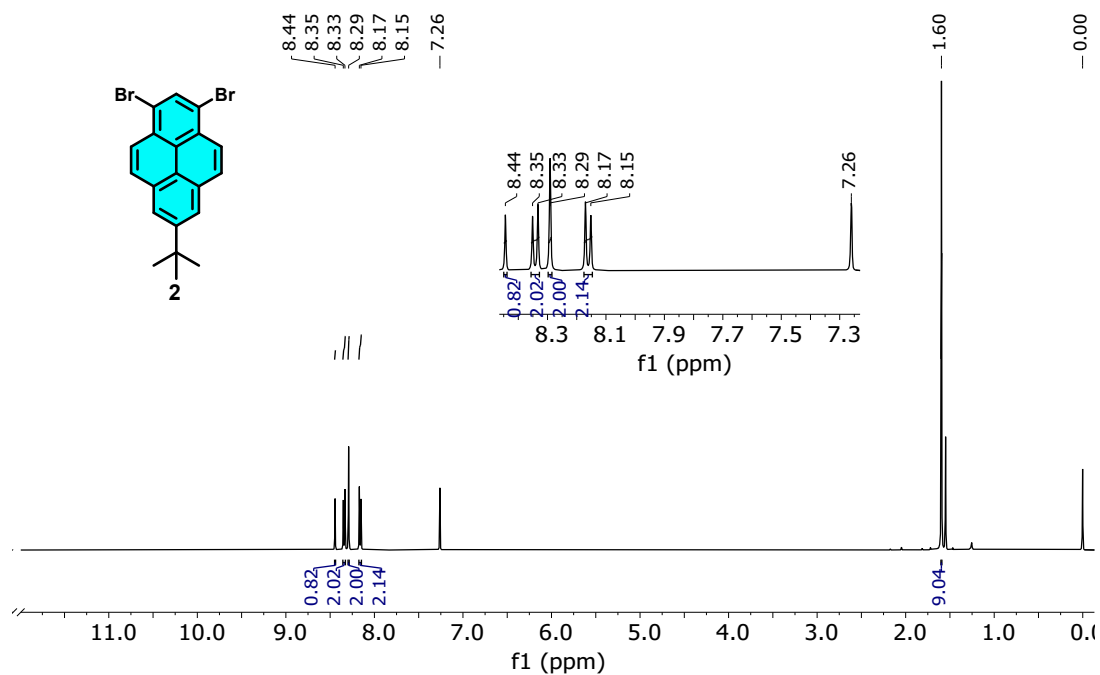

Figure S23.  $^1\text{H NMR}$  (500 MHz,  $\text{CDCl}_3$ ) of **2**

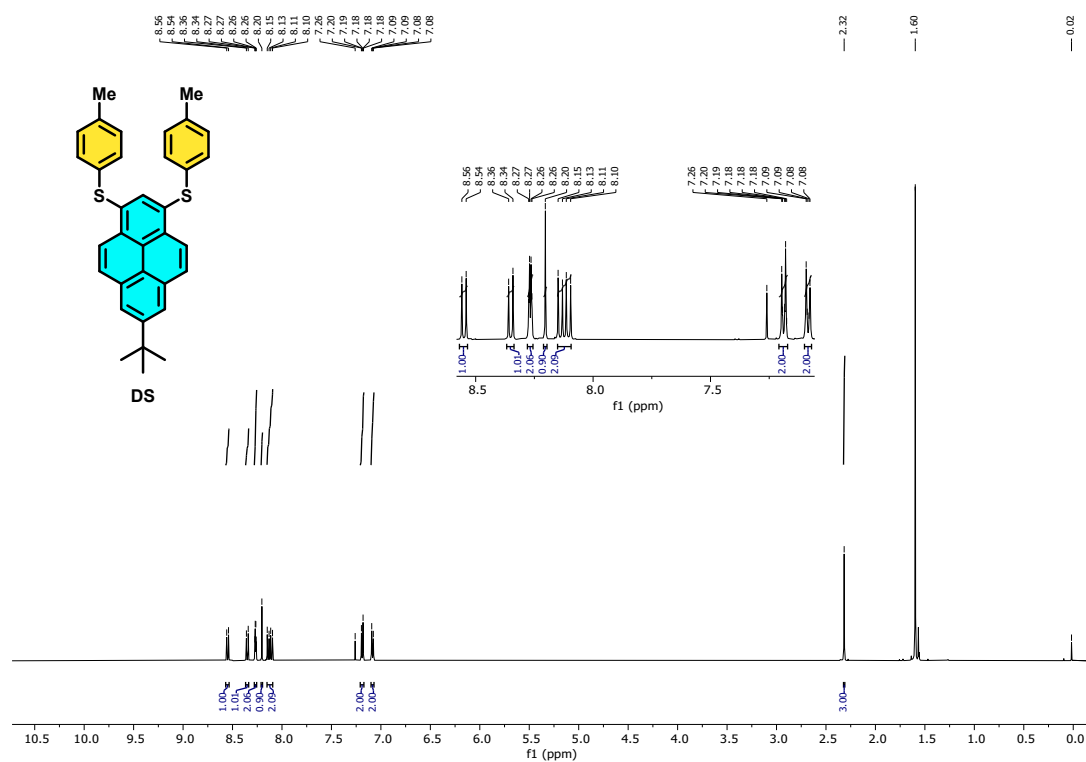

Figure S24.  $^1\text{H NMR}$  (500 MHz,  $\text{CDCl}_3$ ) of **DS**

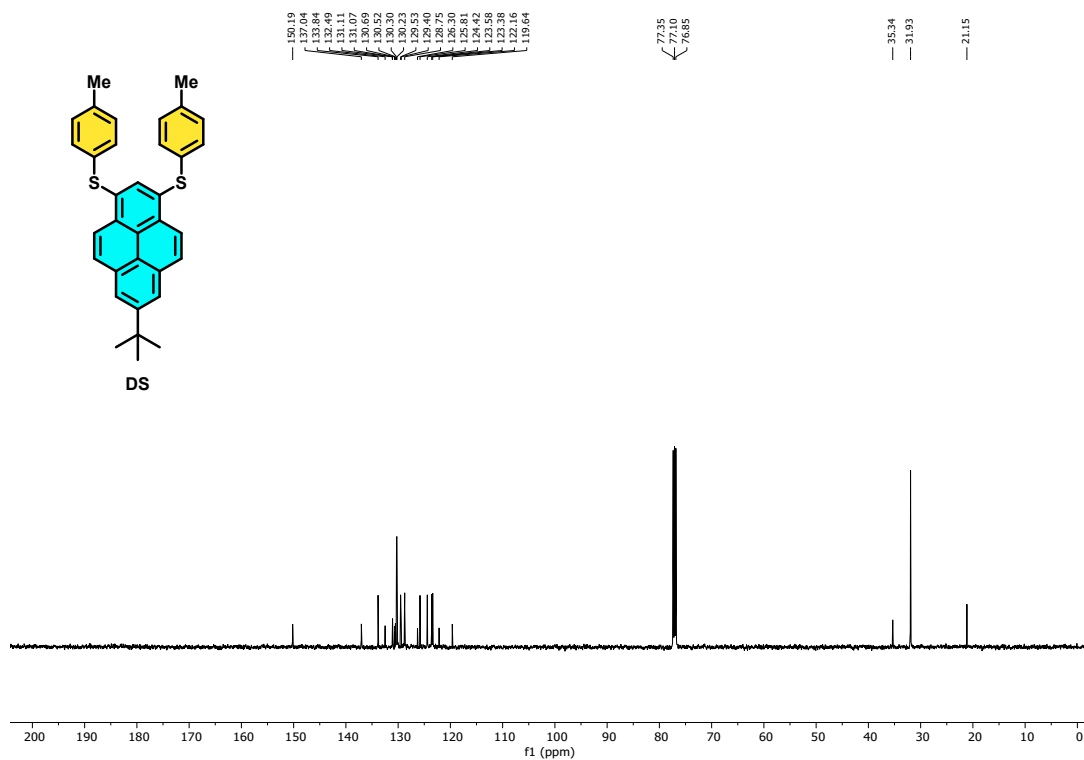

Figure S25.  $^{13}\text{C}\{^1\text{H}\}$  NMR (125 MHz,  $\text{CDCl}_3$ ) of DS.

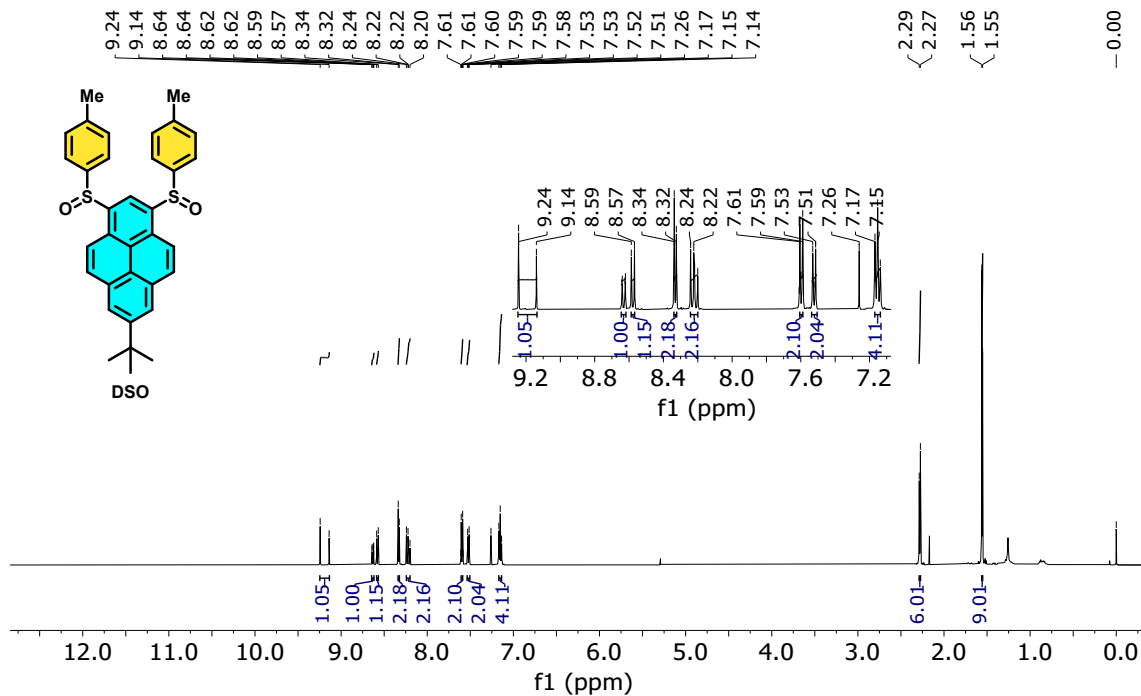

Figure S26.  $^1\text{H}$  NMR (500 MHz,  $\text{CDCl}_3$ ) of DSO

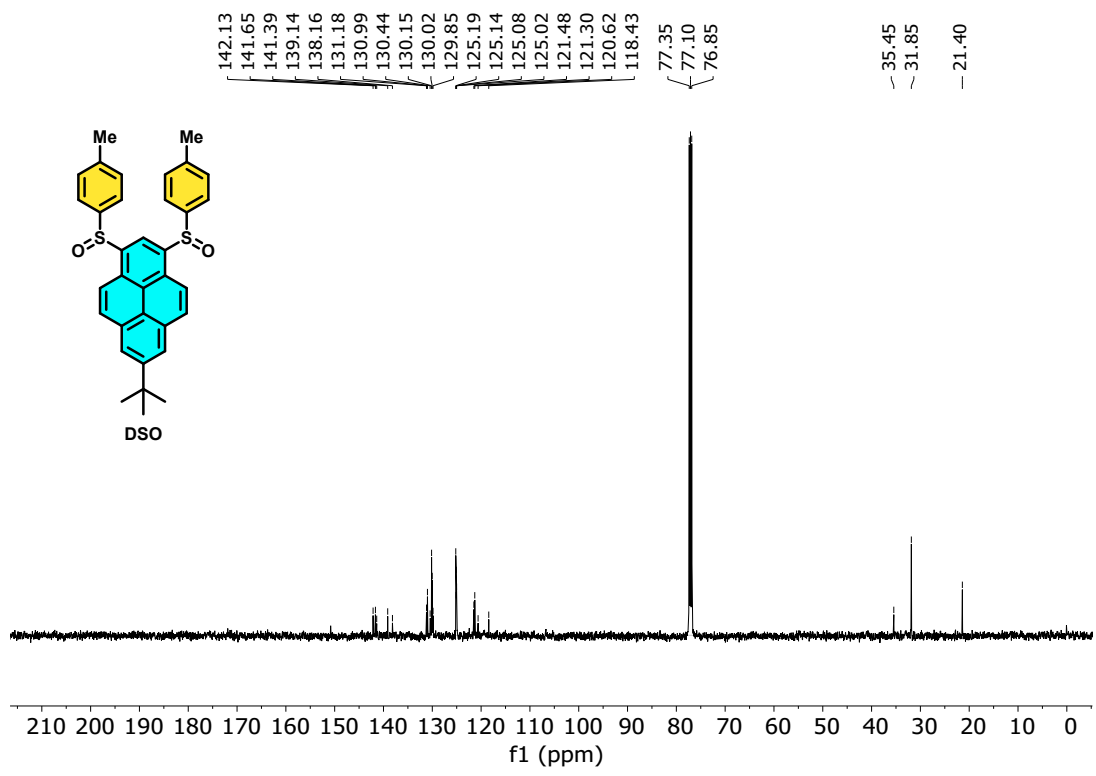

Figure S27.  $^{13}\text{C}\{^1\text{H}\}$  NMR (125 MHz,  $\text{CDCl}_3$ ) of DSO

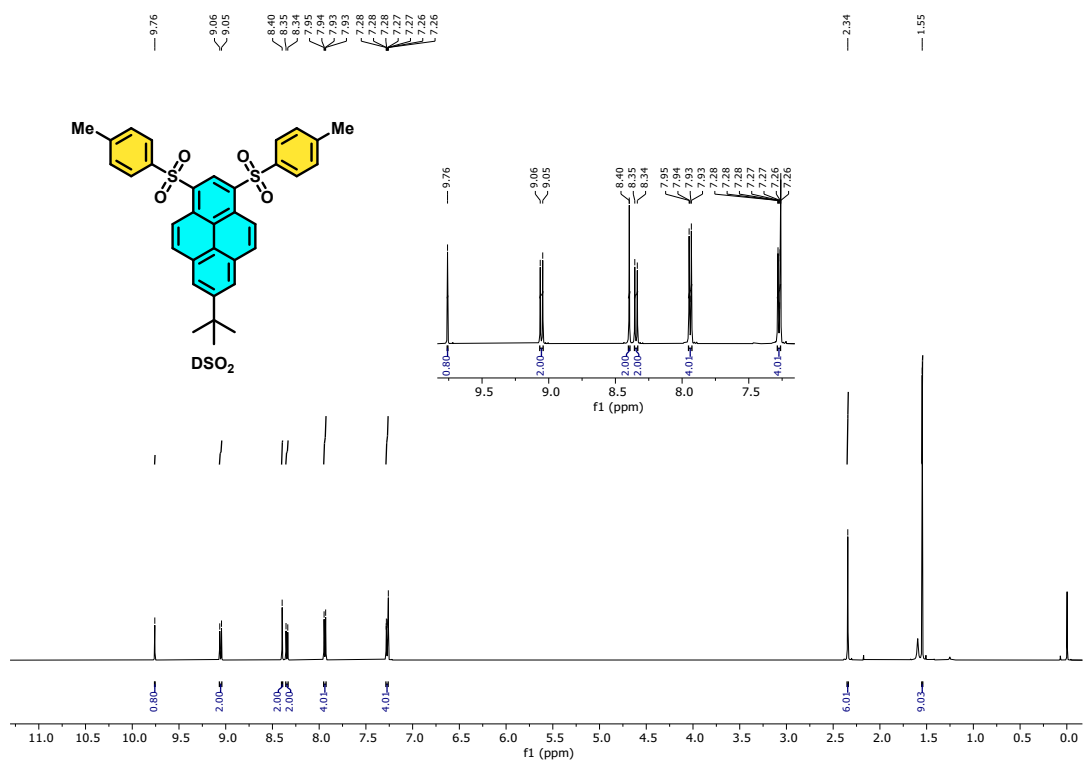

Figure S28.  $^1\text{H}$  NMR (500 MHz,  $\text{CDCl}_3$ ) of DSO<sub>2</sub>

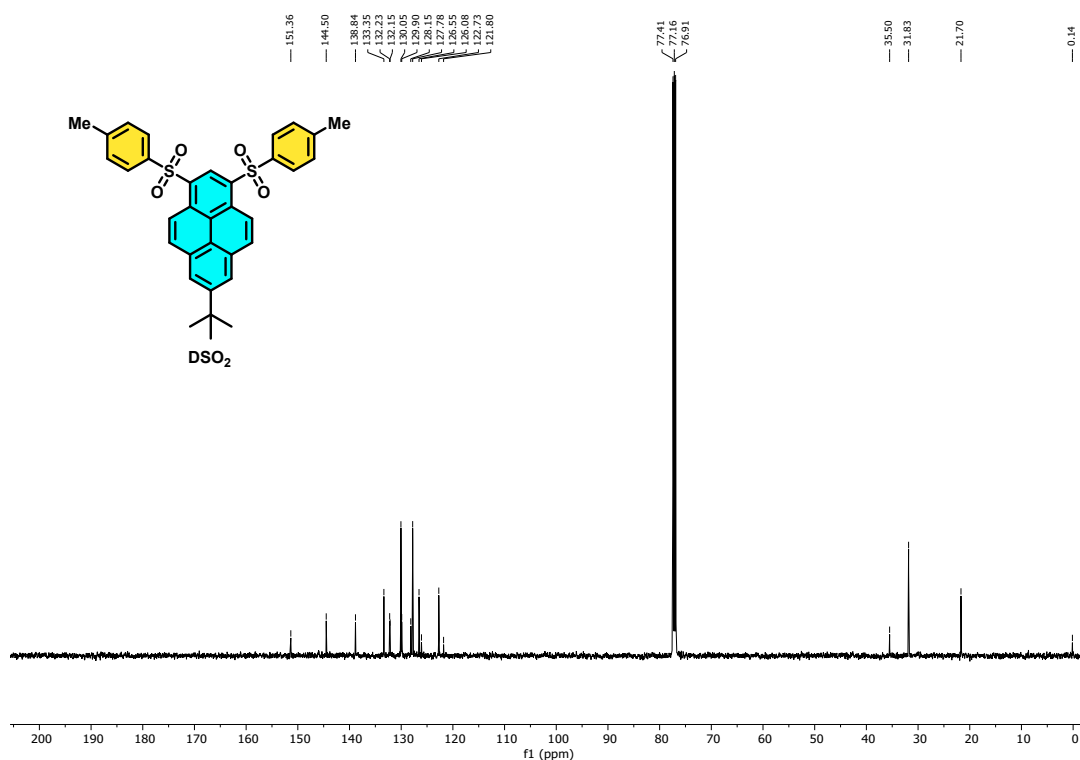

Figure S29.  $^{13}\text{C}\{^1\text{H}\}$  NMR (125 MHz,  $\text{CDCl}_3$ ) of  $\text{DSO}_2$

## References

1. F. Neese, *Wiley Interdiscip. Rev.: Comput. Mol. Sci.*, 2025, **15**, 2, e70019.
2. T. Lu, *J. Chem. Phys.*, 2024, **161**, e082503.
3. A. Karuppusamy, T. Vandana and P. Kannan, *Journal of Photochemistry and Photobiology A: Chemistry*, 2017, **345**, 11-20.
4. L. Djordjevic, C. Valentini, N. Demitri, C. Meziere, M. Allain, M. Salle, A. Folli, D. Murphy, S. Manas-Valero, E. Coronado, D. Bonifazi, *Angew. Chem., Int. Ed.*, 2020, **59**, 4106-4114.
5. J. Han, L. Wang, Y. Zhang, Y. Li, J. Wang, *Org. Lett.* 2021, **23**, 8688-8693.
